# Supplementary material for: SINCERA: A Pipeline for Single-Cell RNA-Seq Profiling Analysis
Source: PLoS Comput Biol. 2015 Nov 24;11(11):e1004575. doi: 10.1371/journal.pcbi.1004575 (PMC4658017; doi:10.1371/journal.pcbi.1004575)
Supplement: S1 Table — The following categories of functional annotations are included: GO: Biological Process, GO: Cellular Component, mouse phenotype, co-expressed gene sets, pathway, and transcription factor binding site. The results were obtained using the ToppGene suite (https://toppgene.cchmc.org) using cluster specific differentially expressed genes as the input gene lists. (XLSX) [file pcbi.1004575.s022.xlsx]

## Sheet: Functional Enrichment
	S1 Table. Enriched Functional Annotations for Each Cluster Using Cluster Specific Differentially Expressed Genes. The following categories of functional annotations are included: GO: Biological Process, GO: Cellular Component, mouse phenotype, co-expressed gene sets, pathway, and transcription factor binding site. The results were obtained using the ToppGene suite (https://toppgene.cchmc.org) usi…
	CLUSTER	CATEGORY	ID	NAME	SOURCE	P-VALUE	Q-VALUE BONFERRONI	Q-VALUE FDR B&H	Q-VALUE FDR B&Y	HIT COUNT IN QUERY LIST	HIT COUNT IN GENOME	HIT IN QUERY LIST
	C1	Coexpression	M11537	Fibroblast serum response genes showing periodic expression during the cell cycle; excluded from the core serum response signature.	MSigDB C2: Broad Institute	1.011e-46	4.548e-43	2.274e-44	2.044e-43	33	148	FOXM1,NUSAP1,PTTG1,KIF23,ILF2,CENPA,KIAA0101,UBE2C,TUBB,SMC4,BIRC5,HMMR,RFC4,RRM1,ATAD2,NCAPH,CCNA2,CENPQ,AURKA,CKS2,TUBB4B,CENPM,ANLN,CCNB2,BUB1,TPX2,CKAP2L,FAM64A,CDK1,TACC3,TOP2A,MAD2L1,KIF22
	C1	Coexpression	M1577	Strongly up-regulated at 16-24 h during differentiation of 3T3-L1 cells (fibroblast) into adipocytes.	MSigDB C2: University of Washington	1.562e-40	7.029e-37	1.9e-38	1.708e-37	27	101	NUSAP1,ILF2,INCENP,KIAA0101,HMGB2,BIRC5,PRC1,SMC2,RRM1,NCAPH,TTK,CCNB1,AURKA,TUBB6,CKS2,HIST1H2AB,CCNB2,VCAN,CSRP2,BUB1,MKI67,CDK1,TACC3,TOP2A,MAD2L1,KIF11,KIF22
	C1	Coexpression	M1945	Genes up-regulated in MEF cells (embryonic fibroblast) after expression of E2F1 or E2F2 [GeneID=1869;1870].	MSigDB C2: Broad Institute	2.397e-29	1.078e-25	1.239e-27	1.114e-26	18	53	NUSAP1,PTTG1,HMGB2,HMGB3,STMN1,PRC1,SMC2,RRM1,SGOL1,NCAPH,CCNA2,CCNB1,ANLN,CCNB2,BUB1,MKI67,CDK1,TOP2A
	C1	GO: Biological Process	GO:0007049	cell cycle		1.483e-31	2.802e-28	9.34e-29	7.585e-28	57	1611	FOXM1,NUSAP1,CDCA3,RAN,TBX3,PTTG1,KIF23,CENPA,INCENP,CENPE,KIAA0101,SMC1A,UBE2C,SPC25,TUBB,SMC4,BIRC2,BIRC5,SKA2,STMN1,PRC1,SMC2,RFC4,RRM1,SGOL1,NCAPH,TTK,CCNA2,CCNB1,CENPQ,SPC24,AURKA,CKS2,TUBB4B,NCAPG,KIF15,TUBA1A,CDC123,CTCF,CENPM,ANLN,CCNB2,SPIN1,SUV39H1,BUB1,TPX2,MKI67,FAM64A,CDK1,TACC3,ESPL1,SKA1,RPA3,TOP2A,MAD2L1,KIF11,KIF22
	C1	GO: Biological Process	GO:0048285	organelle fission		8.769e-30	1.656e-26	2.366e-27	1.922e-26	38	573	NUSAP1,CDCA3,RAN,PTTG1,KIF23,INCENP,CENPE,SMC1A,UBE2C,SPC25,SMC4,BIRC5,SKA2,SMC2,SGOL1,NCAPH,TTK,CCNA2,CCNB1,SPC24,AURKA,CKS2,NCAPG,KIF15,ANLN,CCNB2,SPIN1,BUB1,TPX2,MKI67,FAM64A,CDK1,ESPL1,SKA1,TOP2A,MAD2L1,KIF11,KIF22
	C1	GO: Biological Process	GO:0055013	cardiac muscle cell development		3.11e-05	0.05874	0.0006911	0.005613	5	61	TBX3,PDGFRA,CCNB1,CDK1,NEXN
	C1	GO: Biological Process	GO:0008283	cell proliferation		0.0002543	0.4804	0.004037	0.03278	24	1887	FOXM1,TBX3,PTTG1,PDGFRA,PRDX4,BIRC2,HMGB2,BIRC5,RRM1,TTK,CCNA2,CCNB1,ADK,CKS2,HHIP,KIF15,CDC123,SHCBP1,BUB1,TPX2,MKI67,CDK1,TACC3,RPA3
	C1	GO: Biological Process	GO:0008543	fibroblast growth factor receptor signaling pathway		0.02601	49.13	0.1273	1	4	188	PDGFRA,HHIP,SHCBP1,CDK1
	C1	Mouse Phenotype	MP:0003077	abnormal cell cycle		2.453e-10	2.997e-07	2.997e-07	2.304e-06	15	245	FOXM1,NUSAP1,PTTG1,CENPA,CENPE,RBM3,SMC1A,BIRC5,CCNA2,AURKA,BUB1,TPX2,CDK1,TACC3,MAD2L1
	C1	Mouse Phenotype	MP:0008762	embryonic lethality		3.61e-08	4.411e-05	8.823e-06	6.781e-05	30	1477	NUSAP1,TBX3,PTTG1,ILF2,TBX4,CENPA,INCENP,PDGFRA,CENPE,BIRC2,BIRC5,PRC1,NCAPH,HNRNPL,CCNA2,CCNB1,AURKA,HHIP,BRD8,CTCF,VCAN,BUB1,TPX2,H2AFZ,CDK1,TACC3,ESPL1,MAD2L1,KIF11,KIF22
	C1	Transcription Factor Binding Site	V$E2F_03	V$E2F_03		7.117e-06	0.002904	0.001452	0.009568	9	191	TBX3,PDGFRA,KIAA0101,STMN1,ATAD2,LGALS1,CTCF,SUV39H1,H2AFZ
	C1	Transcription Factor Binding Site	V$NFY_Q6	V$NFY_Q6		1.589e-05	0.006482	0.002161	0.01424	9	211	HMGB2,SKA2,TTK,CKS2,HIST1H2AB,SUV39H1,BUB1,CDK1,TOP2A
	C1	Transcription Factor Binding Site	V$GATA1_02	V$GATA1_02		0.01307	5.333	0.1839	1	5	199	TBX4,PDGFRA,HNRNPL,CTCF,SUV39H1
	C1	Transcription Factor Binding Site	V$PAX6_01	V$PAX6_01		0.01819	7.423	0.2395	1	3	79	PDGFRA,RRM1,H2AFZ
	C2	GO: Biological Process	GO:0003012	muscle system process		3.638e-06	0.006062	0.005149	0.04117	7	352	TPM1,IGF1,NR3C1,MYL9,CALD1,RGS2,EDNRB
	C2	GO: Biological Process	GO:0009888	tissue development		1.238e-05	0.02062	0.005867	0.04691	13	1794	TPM1,GHR,TGFBI,ROBO1,MLLT3,TNFRSF19,IGF1,TAGLN,NR3C1,MGP,PDGFRA,EDNRB,TBX5
	C2	GO: Biological Process	GO:0014743	regulation of muscle hypertrophy		2.198e-05	0.03662	0.005867	0.04691	3	29	IGF1,NR3C1,RGS2
	C2	GO: Biological Process	GO:0042692	muscle cell differentiation		3.302e-05	0.05502	0.006877	0.05499	6	331	TPM1,IGF1,NR3C1,PDGFRA,EDNRB,TBX5
	C2	GO: Biological Process	GO:0040011	locomotion		7.435e-05	0.1239	0.01124	0.08989	11	1522	TPM1,ROBO1,LSP1,KANK1,IGF1,MYL9,ITGA9,CD248,PDGFRA,EDNRB,TBX5
	C2	GO: Cellular Component	GO:0031256	leading edge membrane		0.0001106	0.01448	0.009849	0.05374	4	135	TPM1,ROBO1,KANK1,FERMT2
	C2	GO: Cellular Component	GO:0032432	actin filament bundle		0.0002255	0.02955	0.009849	0.05374	3	64	TPM1,MYL9,FERMT2
	C2	GO: Cellular Component	GO:0042641	actomyosin		0.0003196	0.04187	0.01047	0.05711	3	72	TPM1,MYL9,FERMT2
	C2	GO: Cellular Component	GO:0005578	proteinaceous extracellular matrix		0.0004275	0.056	0.01063	0.05801	5	348	TGFBI,MFAP2,IGF1,MGP,CD248
	C2	GO: Cellular Component	GO:0030016	myofibril		0.0004869	0.06379	0.01063	0.05801	4	199	TPM1,MYL9,CALD1,FERMT2
	C2	Mouse Phenotype	MP:0004202	pulmonary hyperplasia		7.996e-07	0.001182	0.001182	0.009308	3	6	NR3C1,FSTL1,PDGFRA
	C2	Mouse Phenotype	MP:0008271	abnormal bone ossification		1.109e-05	0.0164	0.004155	0.03273	8	324	GHR,MLLT3,IGF1,NR3C1,FSTL1,MGP,PDGFRA,EDNRB
	C2	Mouse Phenotype	MP:0002267	abnormal bronchiole morphology		0.0002886	0.4265	0.04246	0.3344	3	37	ROBO1,NR3C1,FSTL1
	C2	Mouse Phenotype	MP:0003409	decreased width of hypertrophic chondrocyte zone		0.0003126	0.462	0.04246	0.3344	3	38	GHR,IGF1,MGP
	C2	Mouse Phenotype	MP:0001943	abnormal respiration		0.00127	1.878	0.05075	0.3997	7	489	ROBO1,IGF1,NR3C1,FSTL1,ITGA9,PDGFRA,EDNRB
	C2	Pathway	161025	Smooth Muscle Contraction	BioSystems: REACTOME	2.586e-05	0.006802	0.0006802	0.004184	3	24	TPM1,MYL9,CALD1
	C2	Pathway	712094	Cardiac Progenitor Differentiation	BioSystems: WikiPathways	0.0002855	0.07509	0.003004	0.01848	3	53	IGF1,PDGFRA,TBX5
	C2	Pathway	198812	Endochondral Ossification	BioSystems: WikiPathways	0.000546	0.1436	0.005523	0.03398	3	66	GHR,IGF1,MGP
	C2	Pathway	114229	Hypertrophic cardiomyopathy (HCM)	BioSystems: KEGG	0.001066	0.2805	0.009436	0.05805	3	83	TPM1,IGF1,ITGA9
	C2	Pathway	83067	Focal adhesion	BioSystems: KEGG	0.001498	0.3939	0.01159	0.07127	4	206	IGF1,MYL9,ITGA9,PDGFRA
	C2	Transcription Factor Binding Site	V$GATA1_04	V$GATA1_04		2.808e-05	0.008228	0.004341	0.02717	6	209	TNFRSF19,IGF1,NR3C1,CALD1,PDGFRA,TBX5
	C2	Transcription Factor Binding Site	V$SRF_Q6	V$SRF_Q6		2.963e-05	0.008682	0.004341	0.02717	6	211	LSP1,IGF1,NNAT,TAGLN,MYL9,CALD1
	C2	Transcription Factor Binding Site	TGGAAA_V$NFAT_Q4_01	TGGAAA_V$NFAT_Q4_01		0.0001482	0.04342	0.01447	0.09059	13	1497	TPM1,MLLT3,TNFRSF19,IGF1,NNAT,NR3C1,FSTL1,MGP,CALD1,PDGFRA,RGS2,GYPC,TBX5
	C2	Transcription Factor Binding Site	TTGTTT_V$FOXO4_01	TTGTTT_V$FOXO4_01		0.0003005	0.08805	0.02201	0.1378	13	1603	CKB,GHR,ROBO1,MLLT3,TNFRSF19,KANK1,IGF1,NR3C1,FSTL1,PDGFRA,ENC1,GPR126,TBX5
	C2	Transcription Factor Binding Site	V$SRF_Q4	V$SRF_Q4		0.002337	0.6847	0.07607	0.4761	4	192	TPM1,TAGLN,MYL9,CALD1
	C3	GO: Biological Process	GO:1901700	response to oxygen-containing compound		7.56e-06	0.01235	0.004384	0.03497	12	1314	COL4A1,SDF4,GNAS,ATP7A,PFKL,F2R,PDGFRB,GNG11,YWHAB,AXL,NR2F2,LGALS1
	C3	GO: Biological Process	GO:0042060	wound healing		0.0004164	0.68	0.01292	0.103	7	681	GNAS,ATP1B2,AJUBA,F2R,GUCY1A3,PDGFRB,AXL
	C3	GO: Biological Process	GO:0001568	blood vessel development		0.0009627	1.572	0.02179	0.1738	6	566	COL4A1,ATP7A,PDGFRB,CDH2,NR2F2,NOTCH3
	C3	GO: Biological Process	GO:0043408	regulation of MAPK cascade		0.001063	1.737	0.02316	0.1847	6	577	AJUBA,TIMP2,F2R,PDGFRB,CDH2,YWHAB
	C3	GO: Biological Process	GO:0007155	cell adhesion		0.001246	2.034	0.02393	0.1909	8	1067	POSTN,GNAS,ATP1B2,AJUBA,CDH2,AXL,LGALS1,PDZD2
	C3	GO: Cellular Component	GO:0019897	extrinsic component of plasma membrane		0.00133	0.2249	0.08419	0.4808	3	108	GNAS,GNG11,CDH2
	C3	GO: Cellular Component	GO:0031012	extracellular matrix		0.001495	0.2526	0.08419	0.4808	5	422	COL4A1,POSTN,ADAMTSL3,TIMP2,LGALS1
	C3	GO: Cellular Component	GO:0098590	plasma membrane region		0.01543	2.607	0.1026	0.5859	4	480	ATP7A,ATP1B2,PDGFRB,CDH2
	C3	GO: Cellular Component	GO:0044431	Golgi apparatus part		0.02206	3.729	0.1036	0.5914	5	807	POSTN,SDF4,GNAS,ATP7A,NOTCH3
	C3	GO: Cellular Component	GO:0005911	cell-cell junction		0.03885	6.566	0.1336	0.7627	3	373	AJUBA,CDH2,PDZD2
	C3	Mouse Phenotype	MP:0002152	abnormal brain morphology		9.75e-05	0.1301	0.127	0.9869	13	1340	COL4A1,EBF1,GNAS,ATP7A,PFKL,ATP1B2,F2R,TUBA1A,PDGFRB,CDH2,AXL,LGALS1,NOTCH3
	C3	Mouse Phenotype	MP:0001785	edema		0.0001903	0.2539	0.127	0.9869	7	389	GNAS,PFKL,F2R,PDGFRB,CDH2,RGS5,NR2F2
	C3	Mouse Phenotype	MP:0001544	abnormal cardiovascular system physiology		0.001048	1.398	0.1577	1	11	1243	COL4A1,POSTN,GNAS,ATP7A,F2R,PDGFRB,CDH2,RGS5,AXL,NR2F2,NOTCH3
	C3	Mouse Phenotype	MP:0001614	abnormal blood vessel morphology		0.002659	3.547	0.1577	1	9	970	COL4A1,DLK1,ATP7A,F2R,PDGFRB,CDH2,RGS5,NR2F2,NOTCH3
	C3	Mouse Phenotype	MP:0001784	abnormal fluid regulation		0.003105	4.143	0.1577	1	7	621	GNAS,PFKL,F2R,PDGFRB,CDH2,RGS5,NR2F2
	C3	Pathway	198759	Myometrial Relaxation and Contraction Pathways	BioSystems: WikiPathways	3.249e-06	0.001628	0.001628	0.01106	6	155	GNAS,CALD1,GUCY1A3,GNG11,YWHAB,RGS5
	C3	Pathway	83072	Gap junction	BioSystems: KEGG	9.507e-05	0.04763	0.01588	0.1079	4	89	GNAS,GUCY1A3,TUBA1A,PDGFRB
	C3	Pathway	187198	Platelet homeostasis	BioSystems: REACTOME	0.001373	0.688	0.06675	0.4536	3	81	GNAS,GUCY1A3,GNG11
	C3	Pathway	105909	Regulation of Insulin Secretion	BioSystems: REACTOME	0.001373	0.688	0.06675	0.4536	3	81	GNAS,GNG11,MARCKS
	C3	Pathway	692234	PI3K-Akt signaling pathway	BioSystems: KEGG	0.002271	1.138	0.06675	0.4536	5	346	COL4A1,F2R,PDGFRB,GNG11,YWHAB
	C3	Transcription Factor Binding Site	V$FAC1_01	V$FAC1_01		0.001279	0.4016	0.267	1	4	169	GNAS,PDGFRB,GNG11,NR2F2
	C3	Transcription Factor Binding Site	V$SP1_Q2_01	V$SP1_Q2_01		0.002417	0.759	0.267	1	4	201	AJUBA,CDH2,NR2F2,NOTCH3
	C3	Transcription Factor Binding Site	V$CEBP_Q3	V$CEBP_Q3		0.002551	0.8009	0.267	1	4	204	CALD1,PDGFRB,NR2F2,NAB1
	C3	Transcription Factor Binding Site	V$RORA2_01	V$RORA2_01		0.004956	1.556	0.389	1	3	122	COX4I2,ATP1B2,MARCKS
	C3	Transcription Factor Binding Site	CATTGTYY_V$SOX9_B1	CATTGTYY_V$SOX9_B1		0.009195	2.887	0.3982	1	4	293	CALD1,GNG11,MARCKS,NOTCH3
	C5	GO: Biological Process	GO:0030198	extracellular matrix organization		4.543e-14	1.271e-10	6.487e-11	5.523e-10	24	385	COL3A1,COL5A2,COL6A1,COL6A2,COL6A3,DPT,COL13A1,FN1,ITGA8,COL25A1,EMILIN1,BGN,B4GALT1,MFAP4,FBN1,LOX,LOXL1,LRP4,COL14A1,ELN,MMP2,VCAM1,NPNT,COL1A1
	C5	GO: Biological Process	GO:0007155	cell adhesion		6.955e-14	1.946e-10	6.487e-11	5.523e-10	38	1067	COL3A1,CASS4,COL6A1,COL6A2,COL6A3,DPT,MYH10,COL13A1,ANGPT1,FN1,PCDHGA11,ITGA8,SPECC1L,EMILIN1,ZYX,SVEP1,FREM1,GSN,B4GALT1,TGFB1I1,SLIT2,MFAP4,NEO1,SERPINE2,DLC1,NUAK1,PPAP2B,SPON1,SNAI2,MACF1,COL14A1,CCL11,MMP2,FBLIM1,CDH11,VCAM1,NPNT,COL1A1
	C5	GO: Biological Process	GO:0044243	multicellular organismal catabolic process		6.652e-12	1.861e-08	3.102e-09	2.641e-08	12	82	COL3A1,COL5A2,COL6A1,COL6A2,COL6A3,COL13A1,COL25A1,MRC2,COL14A1,MMP2,ENPEP,COL1A1
	C5	GO: Biological Process	GO:0072359	circulatory system development		1.133e-11	3.171e-08	3.951e-09	3.364e-08	32	905	COL3A1,MYH10,ANGPT1,MYLK,TCF21,FN1,NEBL,ADAMTS1,WNT2,NR2F2,EDNRA,B4GALT1,MEOX2,SLIT2,FBN1,DLC1,PPAP2B,ZFP36L1,LOX,ANGPTL4,SNAI2,LRP1,COL14A1,FGF10,CCL11,SNAI1,MMP2,BMPER,FIGF,ENPEP,VCAM1,COL1A1
	C5	GO: Biological Process	GO:0032963	collagen metabolic process		4.324e-11	1.21e-07	9.307e-09	7.924e-08	13	120	COL3A1,COL5A2,COL6A1,COL6A2,COL6A3,COL13A1,COL25A1,MFAP4,MRC2,COL14A1,MMP2,PRDX5,COL1A1
	C5	GO: Cellular Component	GO:0031012	extracellular matrix		2.979e-21	8.462e-19	8.462e-19	5.27e-18	32	422	COL3A1,COL5A2,COL6A1,COL6A2,COL6A3,DPT,FN1,RARRES2,ADAMTS1,WNT2,GRIA3,OGN,SLC1A3,EMILIN1,FREM1,BGN,TGFB1I1,MFAP4,SERPINE2,FBN1,LOX,LOXL1,SPON1,ANGPTL4,ADAMTS17,COL14A1,FGF10,ELN,MMP2,NPNT,COL1A1,PCOLCE
	C5	GO: Cellular Component	GO:0005581	collagen trimer		1.318e-12	3.742e-10	1.247e-10	7.769e-10	13	93	COL3A1,COL5A2,COL6A1,COL6A2,COL6A3,COL13A1,COL25A1,EMILIN1,COLEC12,LOX,COL14A1,COL1A1,PCOLCE
	C5	GO: Cellular Component	GO:0005615	extracellular space		2.966e-12	8.423e-10	2.106e-10	1.311e-09	39	1284	COL3A1,CFH,DPEP1,COL6A2,VLDLR,COL6A3,DPT,ANGPT1,FN1,SELENBP1,WNT2,SH3BGRL,GPX3,CP,COL25A1,OGN,PRDX6,GSN,B4GALT1,SLIT2,SERPINE2,FBN1,IGF2R,LOX,LOXL1,SPON1,ANGPTL4,CD40,SERPING1,COL14A1,FGF10,CCL11,MMP2,BMPER,PRDX5,FIGF,VCAM1,COL1A1,PCOLCE
	C5	GO: Cellular Component	GO:0005788	endoplasmic reticulum lumen		5.347e-06	0.001519	0.0001687	0.001051	10	187	COL3A1,COL5A2,COL6A1,COL6A2,COL6A3,COL13A1,COL25A1,H6PD,COL14A1,COL1A1
	C5	GO: Cellular Component	GO:0009986	cell surface		3.646e-05	0.01036	0.001036	0.00645	18	700	VLDLR,MYH10,MYLK,MXRA8,SLC1A3,LPAR1,BGN,B4GALT1,SLIT2,SERPINE2,IGF2R,MRC2,CD40,LRP4,FGF10,TNS1,ENPEP,VCAM1
	C5	Mouse Phenotype	MP:0008438	abnormal cutaneous collagen fibril morphology		1.147e-08	3.135e-05	3.135e-05	0.0002662	7	22	COL3A1,COL5A2,DPT,OGN,BGN,FBN1,LOX
	C5	Mouse Phenotype	MP:0001175	abnormal lung morphology		5.004e-07	0.001368	0.0002984	0.002533	22	482	COL3A1,CDO1,TCF21,WNT2,ITGA8,TMEM38B,PRDX6,FREM1,AKAP12,B4GALT1,LIPA,FBN1,IGF2R,LOX,LOXL1,LRP4,FGF10,CMKLR1,MMP2,BMPER,HSD11B1,TNS3
	C5	Mouse Phenotype	MP:0009862	abnormal aorta elastic tissue morphology		5.091e-07	0.001391	0.0002984	0.002533	6	23	COL3A1,EMILIN1,FBN1,LOX,LRP1,COL1A1
	C5	Mouse Phenotype	MP:0002279	abnormal diaphragm morphology		5.942e-06	0.01624	0.001476	0.01253	8	72	COL6A1,TCF21,FREM1,FBN1,LOX,LRP1,FGF10,MMP2
	C5	Mouse Phenotype	MP:0010899	abnormal pulmonary alveolar system morphology		7.061e-06	0.0193	0.001608	0.01365	13	214	CDO1,TCF21,TMEM38B,PRDX6,B4GALT1,LIPA,FBN1,LOX,LOXL1,CMKLR1,BMPER,HSD11B1,TNS3
	C5	Pathway	576262	Extracellular matrix organization	BioSystems: REACTOME	9.622e-14	7.601e-11	7.601e-11	5.511e-10	22	264	COL3A1,COL5A2,COL6A1,COL6A2,COL6A3,COL13A1,FN1,ADAMTS1,ITGA8,COL25A1,BGN,MFAP4,FBN1,LOX,LOXL1,LRP4,COL14A1,ELN,MMP2,VCAM1,COL1A1,PCOLCE
	C5	Pathway	645289	Collagen biosynthesis and modifying enzymes	BioSystems: REACTOME	2.015e-09	1.591e-06	5.305e-07	3.846e-06	10	65	COL3A1,COL5A2,COL6A1,COL6A2,COL6A3,COL13A1,COL25A1,COL14A1,COL1A1,PCOLCE
	C5	Pathway	172847	Protein digestion and absorption	BioSystems: KEGG	4.105e-08	3.243e-05	6.486e-06	4.702e-05	10	88	COL3A1,COL5A2,COL6A1,COL6A2,COL6A3,COL13A1,COL14A1,ELN,MME,COL1A1
	C5	Pathway	83068	ECM-receptor interaction	BioSystems: KEGG	4.589e-06	0.003625	0.0005992	0.004344	8	86	COL3A1,COL5A2,COL6A1,COL6A2,COL6A3,FN1,ITGA8,COL1A1
	C5	Pathway	730310	Elastic fibre formation	BioSystems: REACTOME	5.309e-06	0.004194	0.0005992	0.004344	6	41	ITGA8,MFAP4,FBN1,LOX,LOXL1,ELN
	C5	Transcription Factor Binding Site	V$RP58_01	V$RP58_01		7.861e-05	0.04166	0.02083	0.1427	10	187	COL3A1,MAGED1,WNT2,ITGA8,DAPK1,COLEC12,PPAP2B,FGF10,CMKLR1,PCOLCE
	C5	Transcription Factor Binding Site	V$STAT6_01	V$STAT6_01		0.0001894	0.1004	0.02509	0.1719	10	208	FN1,RCAN1,GRIA3,NDRG2,NEO1,PLXDC2,RBMS3,UGDH,TACC1,FIGF
	C5	Transcription Factor Binding Site	V$NFAT_Q6	V$NFAT_Q6		0.002253	1.194	0.1257	0.861	8	194	COL3A1,MAGED1,COL25A1,NDRG2,NR2F2,PREX2,RBMS3,ADAMTS17
	C5	Transcription Factor Binding Site	V$SRY_02	V$SRY_02		0.002638	1.398	0.1271	0.8709	8	199	ANGPT1,MYLK,FN1,OLFML3,PREX2,MRC2,LRP1,HSD11B1
	C5	Transcription Factor Binding Site	TTGCWCAAY_V$CEBPB_02	TTGCWCAAY_V$CEBPB_02		0.003164	1.677	0.1306	0.8949	4	51	ANGPT1,IDH1,B4GALT1,ZFP36L1
	C7	GO: Biological Process	GO:0072359	circulatory system development		3.442e-14	8.769e-11	4.385e-11	3.692e-10	33	905	COL4A1,EPHB4,FLT1,FLT4,RAMP2,RHOJ,PECAM1,RGCC,ETS1,CAV1,ECE1,ACE,HDAC7,ARHGEF15,LUZP1,RASIP1,JUP,EFNA1,PTPRB,TIE1,ECSCR,CD34,APLNR,AHR,MMRN2,KDR,ELK3,EGFL7,CALCRL,LY6E,FKBP1A,CDH5,SMAD1
	C7	GO: Biological Process	GO:0001944	vasculature development		6.329e-14	1.613e-10	5.376e-11	4.527e-10	27	595	COL4A1,EPHB4,FLT1,FLT4,RAMP2,RHOJ,PECAM1,RGCC,ETS1,CAV1,ACE,HDAC7,ARHGEF15,LUZP1,RASIP1,EFNA1,PTPRB,TIE1,ECSCR,CD34,AHR,MMRN2,KDR,ELK3,EGFL7,CALCRL,CDH5
	C7	GO: Biological Process	GO:0001525	angiogenesis		6.628e-13	1.689e-09	4.222e-10	3.555e-09	22	411	COL4A1,EPHB4,FLT1,FLT4,RAMP2,RGCC,ETS1,CAV1,ACE,HDAC7,RASIP1,EFNA1,PTPRB,TIE1,ECSCR,CD34,AHR,MMRN2,KDR,ELK3,EGFL7,CALCRL
	C7	GO: Biological Process	GO:0016477	cell migration		4.438e-10	1.131e-06	1.544e-07	1.3e-06	30	1073	EPHB4,VIM,FLT1,FLT4,PLVAP,PODXL,PECAM1,CD2AP,RGCC,ETS1,ITGA6,ESAM,CAV1,ITGA2,ACE,HDAC7,JUP,EFNA1,ARAP3,F11R,TIE1,PPM1F,CD34,MMRN2,KDR,SEMA6A,TNFAIP1,EGFL7,KIT,SH3BGRL3
	C7	GO: Biological Process	GO:0007155	cell adhesion		1.754e-09	4.469e-06	4.063e-07	3.421e-06	29	1067	EPHB4,KIAA1462,PODXL,PECAM1,CD2AP,RGCC,ICAM2,FXYD5,ITGA6,ESAM,ITGA2,PCDH12,EDIL3,PCDH17,CD93,S100A10,LYVE1,JUP,EFNA1,F11R,PPM1F,CD34,MLLT4,KDR,CD97,CLDN5,EGFL7,KIT,CDH5
	C7	GO: Cellular Component	GO:0031226	intrinsic component of plasma membrane		4.697e-09	1.249e-06	9.318e-07	5.742e-06	33	1418	EPHB4,FLT1,FLT4,RAMP2,LPAR4,PODXL,ICAM2,CLEC1A,ITGA6,CAV1,ITGA2,CAV2,PCDH12,LYVE1,ABCG1,EFNA1,PTPRB,GPIHBP1,TIE1,CD34,RASGRP3,APLNR,SCN7A,TSPAN7,TSPAN13,SYPL1,KDR,CD97,SEMA6A,CALCRL,LY6E,TM4SF1,CD200
	C7	GO: Cellular Component	GO:0005911	cell-cell junction		2.781e-05	0.007398	0.001704	0.0105	12	373	KIAA1462,PODXL,CD2AP,ITGA6,ESAM,PCDH12,JUP,F11R,MLLT4,CLDN5,KIT,CDH5
	C7	GO: Cellular Component	GO:0005901	caveola		3.473e-05	0.009239	0.001704	0.0105	6	81	PLVAP,CAV1,CAV2,EHD2,PTRF,SDPR
	C7	GO: Cellular Component	GO:0009897	external side of plasma membrane		3.504e-05	0.009321	0.001704	0.0105	10	265	PECAM1,ITGA6,ITGA2,ECE1,ACE,ABCG1,GPIHBP1,CD34,KDR,KIT
	C7	GO: Cellular Component	GO:0009986	cell surface		8.322e-05	0.02214	0.002214	0.01364	16	700	RAMP2,PLVAP,PECAM1,ITGA6,CAV1,ITGA2,CAV2,ECE1,ACE,CD93,ABCG1,GPIHBP1,CD34,KDR,GPR116,KIT
	C7	Mouse Phenotype	MP:0002127	abnormal cardiovascular system morphology		5.771e-13	1.383e-09	1.383e-09	1.156e-08	48	1473	COL4A1,EPHB4,VIM,FLI1,FLT1,FLT4,RAMP2,PLVAP,LPAR4,RHOJ,PECAM1,CD2AP,ETS1,ETS2,ESAM,CAV1,ECE1,ACE,HDAC7,ARHGEF15,LUZP1,SMTN,TXNIP,MEST,RASIP1,JUP,EFNA1,ARAP3,PTPRB,F11R,TIE1,LMO2,ECSCR,APLNR,AHR,PLEKHA1,MLLT4,KDR,GPR116,PTRF,EGFL7,CALCRL,LY6E,KIT,FKBP1A,CDH5,SDPR,SMAD1
	C7	Mouse Phenotype	MP:0000260	abnormal angiogenesis		3.926e-12	9.406e-09	3.135e-09	2.621e-08	22	304	EPHB4,VIM,FLT1,FLT4,RAMP2,RHOJ,ETS1,ETS2,ESAM,ECE1,HDAC7,ARHGEF15,RASIP1,ARAP3,PTPRB,F11R,TIE1,LMO2,AHR,KDR,EGFL7,CDH5
	C7	Mouse Phenotype	MP:0010200	enlarged lymphatic vessel		2.632e-08	6.307e-05	6.307e-06	5.272e-05	6	17	FLT4,LPAR4,LYVE1,TIE1,KDR,ELK3
	C7	Mouse Phenotype	MP:0006055	abnormal vascular endothelial cell morphology		3.773e-08	9.04e-05	7.534e-06	6.297e-05	9	62	FLI1,FLT1,PLVAP,CAV1,HDAC7,RASIP1,TIE1,PTRF,SDPR
	C7	Mouse Phenotype	MP:0001784	abnormal fluid regulation		5.584e-07	0.001338	8.92e-05	0.0007456	23	621	FLT4,ZEB1,RAMP2,PLVAP,LPAR4,PECAM1,CD2AP,ETS1,ETS2,CAV1,ECE1,APRT,HDAC7,RASIP1,JUP,PTPRB,TIE1,AHR,KDR,ELK3,EGFL7,CALCRL,FKBP1A
	C7	Pathway	106110	Integrin cell surface interactions	BioSystems: REACTOME	7.648e-07	0.000478	0.000478	0.003353	7	66	COL4A1,PECAM1,ICAM2,ITGA6,ITGA2,F11R,KDR
	C7	Pathway	868085	Ras signaling pathway	BioSystems: KEGG	1.059e-05	0.006622	0.003311	0.02323	10	227	FLT1,FLT4,ETS1,ETS2,EFNA1,RASGRP3,MLLT4,KDR,KIT,GNGT2
	C7	Pathway	83069	Cell adhesion molecules (CAMs)	BioSystems: KEGG	1.895e-05	0.01184	0.003368	0.02363	8	147	PECAM1,ICAM2,ITGA6,ESAM,F11R,CD34,CLDN5,CDH5
	C7	Pathway	106508	VEGF binds to VEGFR leading to receptor dimerization	BioSystems: REACTOME	2.544e-05	0.0159	0.003368	0.02363	3	8	FLT1,FLT4,KDR
	C7	Pathway	868086	Rap1 signaling pathway	BioSystems: KEGG	4.189e-05	0.02618	0.003368	0.02363	9	213	FLT1,FLT4,LPAR4,EFNA1,ARAP3,RASGRP3,MLLT4,KDR,KIT
	C7	Transcription Factor Binding Site	RGAGGAARY_V$PU1_Q6	RGAGGAARY_V$PU1_Q6		1.565e-05	0.008248	0.008248	0.05646	15	400	VIM,PLVAP,RHOJ,ICA1,ICAM2,ARHGEF15,PCDH17,S100A10,RASIP1,EFNA1,RASGRP3,AHR,MMRN2,GNGT2,EMCN
	C7	Transcription Factor Binding Site	V$MYOGENIN_Q6	V$MYOGENIN_Q6		0.0002166	0.1142	0.05708	0.3907	9	198	ITGA6,CRIP2,JUP,EIF4G2,ELK3,TNFAIP1,CDH5,KIAA0355,SH3BGRL3
	C7	Transcription Factor Binding Site	RYTTCCTG_V$ETS2_B	RYTTCCTG_V$ETS2_B		0.0005583	0.2942	0.09168	0.6276	20	868	CPNE8,FLT1,RAMP2,RHOJ,MYCT1,CD2AP,ETS1,FXYD5,ESAM,ARHGEF15,LDB2,RASGRP3,PPP1R16B,PLEKHA1,CLDN5,ELK3,EGFL7,CALCRL,CDH5,SDPR
	C7	Transcription Factor Binding Site	GGGTGGRR_V$PAX4_03	GGGTGGRR_V$PAX4_03		0.00129	0.6799	0.136	0.9308	22	1068	VIM,FLI1,TCF4,CPNE8,FLT1,S100A16,MID2,ITGA6,ESAM,ITGA2,ARHGEF15,BCL6B,S100A10,RASIP1,JUP,EIF4G2,AHR,CD97,PTRF,ELK3,SEMA6A,GNGT2
	C7	Transcription Factor Binding Site	TTGTTT_V$FOXO4_01	TTGTTT_V$FOXO4_01		0.003201	1.687	0.1826	1	28	1603	FLI1,TCF4,FLT1,MID2,ETS1,ETS2,STMN1,ITGA2,CAV2,PCDH17,CRIP2,LDB2,BTBD3,TXNIP,ABLIM1,JUP,EFNA1,F11R,RASGRP3,CLDN5,SEMA6A,SPARCL1,EMP1,LPHN2,TM4SF1,CDH5,SMAD1,EMCN
	C8	GO: Biological Process	GO:0006955	immune response		1.11e-13	2.075e-10	2.075e-10	1.683e-09	26	1416	CYBB,TYROBP,ARHGDIB,CORO1A,PTPN6,IGSF6,CSF1R,FCER1G,FCGR1A,FCGR2B,CLEC4A,CTSC,B2M,CLEC7A,NCF2,NCF4,BCL2A1,UNC93B1,LCP1,LCP2,FYB,LY86,ARPC4,CTSS,LGALS1,CYBA
	C8	GO: Biological Process	GO:0001775	cell activation		8.294e-12	1.55e-08	6.249e-09	5.069e-08	20	916	RHOG,TYROBP,CORO1A,PTPN6,PSAP,FCER1G,PTPRE,FCGR2B,B2M,CD48,CLEC7A,TMSB4X,BCL2A1,APOE,LCP1,LCP2,FYB,TF,LGALS1,RAC2
	C8	GO: Biological Process	GO:0009611	response to wounding		3.128e-10	5.846e-07	7.461e-08	6.052e-07	21	1255	CYBB,RHOG,PTPN6,CSF1R,PSAP,FCER1G,FCGR1A,FCGR2B,CD48,CLEC7A,TMSB4X,APOE,LCP1,LCP2,LY86,TF,CTSS,ALOX5AP,LGALS1,RAC2,CYBA
	C8	GO: Biological Process	GO:0019882	antigen processing and presentation		3.194e-10	5.969e-07	7.461e-08	6.052e-07	11	235	CYBB,FCER1G,FCGR1A,FCGR2B,B2M,NCF2,NCF4,UNC93B1,CTSD,CTSS,CYBA
	C8	GO: Biological Process	GO:0090382	phagosome maturation		1.073e-08	2.005e-05	1.542e-06	1.251e-05	6	47	CYBB,CORO1A,ATP6V0C,NCF2,NCF4,CYBA
	C8	GO: Cellular Component	GO:0005764	lysosome		1.38e-13	2.637e-11	1.318e-11	7.689e-11	17	477	HEXA,FNBP1,ATP6V0C,PSAP,MAN2B1,CTSC,CST3,GM2A,NCF2,NCF4,UNC93B1,APOE,CTSA,CTSD,CTSS,CTSZ,LAPTM5
	C8	GO: Cellular Component	GO:0005773	vacuole		7.774e-13	1.485e-10	4.949e-11	2.887e-10	17	531	HEXA,FNBP1,ATP6V0C,PSAP,MAN2B1,CTSC,CST3,GM2A,NCF2,NCF4,UNC93B1,APOE,CTSA,CTSD,CTSS,CTSZ,LAPTM5
	C8	GO: Cellular Component	GO:0045335	phagocytic vesicle		1.502e-10	2.869e-08	5.737e-09	3.346e-08	8	77	CYBB,CORO1A,ATP6V0C,B2M,NCF2,NCF4,UNC93B1,CYBA
	C8	GO: Cellular Component	GO:0043020	NADPH oxidase complex		2.188e-08	4.179e-06	6.965e-07	4.062e-06	4	10	CYBB,NCF2,NCF4,CYBA
	C8	GO: Cellular Component	GO:0009986	cell surface		3.51e-07	6.705e-05	6.095e-06	3.555e-05	13	700	TYROBP,CSF1R,FCER1G,FCGR1A,FCGR2B,B2M,TRPV2,CD48,CLEC7A,APOE,TF,CTSS,LGALS1
	C8	Mouse Phenotype	MP:0001819	abnormal immune cell physiology		3.044e-17	5.168e-14	3.443e-14	2.76e-13	34	1216	CYBB,RHOG,TYROBP,ARHGDIB,CORO1A,PTPN6,CSF1R,PSAP,FCER1G,PTPRE,FCGR1A,FCGR2B,CTSC,B2M,UCP2,SH3KBP1,TRPV2,CD48,CLEC7A,NCF4,BCL2A1,UNC93B1,APOE,RUNX1,LCP1,LCP2,FYB,LY86,CTSS,ALOX5AP,RAC2,LAPTM5,LILRB4,CYBA
	C8	Mouse Phenotype	MP:0002442	abnormal leukocyte physiology		1.923e-16	3.266e-13	8.164e-14	6.543e-13	33	1190	CYBB,RHOG,TYROBP,ARHGDIB,CORO1A,PTPN6,PSAP,FCER1G,PTPRE,FCGR1A,FCGR2B,CTSC,B2M,UCP2,SH3KBP1,TRPV2,CD48,CLEC7A,NCF4,BCL2A1,UNC93B1,APOE,RUNX1,LCP1,LCP2,FYB,LY86,CTSS,ALOX5AP,RAC2,LAPTM5,LILRB4,CYBA
	C8	Mouse Phenotype	MP:0001790	abnormal immune system physiology		7.664e-13	1.301e-09	1.627e-10	1.304e-09	36	1930	CYBB,RHOG,TYROBP,ARHGDIB,CORO1A,PTPN6,CSF1R,PSAP,FCER1G,PTPRE,FCGR1A,FCGR2B,CTSC,B2M,UCP2,SH3KBP1,TRPV2,CD48,CLEC7A,NCF4,BCL2A1,UNC93B1,APOE,RUNX1,LCP1,LCP2,FYB,CTSD,LY86,CTSS,ALOX5AP,LGALS1,RAC2,LAPTM5,LILRB4,CYBA
	C8	Mouse Phenotype	MP:0005025	abnormal response to infection		1.967e-10	3.339e-07	3.339e-08	2.676e-07	19	541	CYBB,TYROBP,CORO1A,PTPN6,FCER1G,FCGR1A,FCGR2B,CTSC,B2M,UCP2,TRPV2,CLEC7A,NCF4,BCL2A1,UNC93B1,APOE,LCP1,RAC2,CYBA
	C8	Mouse Phenotype	MP:0002451	abnormal macrophage physiology		1.933e-09	3.282e-06	2.525e-07	2.024e-06	15	351	CYBB,TYROBP,CORO1A,PTPN6,PSAP,FCER1G,PTPRE,FCGR1A,FCGR2B,UCP2,TRPV2,CLEC7A,UNC93B1,APOE,LCP1
	C8	Pathway	99052	Lysosome	BioSystems: KEGG	4.846e-12	1.745e-09	1.745e-09	1.128e-08	11	122	HEXA,ATP6V0C,PSAP,MAN2B1,CTSC,GM2A,CTSA,CTSD,CTSS,CTSZ,LAPTM5
	C8	Pathway	193147	Osteoclast differentiation	BioSystems: KEGG	2.869e-10	1.033e-07	5.164e-08	3.338e-07	10	132	CYBB,TYROBP,CSF1R,FCGR1A,FCGR2B,NCF2,NCF4,LCP2,LILRB4,CYBA
	C8	Pathway	366160	Adaptive Immune System	BioSystems: REACTOME	1.411e-09	5.08e-07	1.517e-07	9.806e-07	17	648	CYBB,TYROBP,PTPN6,FCGR1A,FCGR2B,CTSC,B2M,SH3KBP1,NCF2,NCF4,LCP2,CTSA,FYB,CTSD,CTSS,LILRB4,CYBA
	C8	Pathway	153910	Phagosome	BioSystems: KEGG	1.685e-09	6.067e-07	1.517e-07	9.806e-07	10	158	CYBB,CORO1A,ATP6V0C,FCGR1A,FCGR2B,CLEC7A,NCF2,NCF4,CTSS,CYBA
	C8	Pathway	477122	Antigen processing-Cross presentation	BioSystems: REACTOME	6.83e-08	2.459e-05	4.098e-06	2.649e-05	7	81	CYBB,FCGR1A,B2M,NCF2,NCF4,CTSS,CYBA
	C8	Transcription Factor Binding Site	V$PEA3_Q6	V$PEA3_Q6		3.172e-05	0.008344	0.008344	0.05132	7	191	RHOG,ARHGDIB,PTPN6,LRMP,NCF2,UNC93B1,CTSS
	C8	Transcription Factor Binding Site	V$NERF_Q2	V$NERF_Q2		0.002185	0.5747	0.1977	1	5	192	ARHGDIB,CORO1A,PTPN6,FCER1G,FCGR2B
	C8	Transcription Factor Binding Site	RYTTCCTG_V$ETS2_B	RYTTCCTG_V$ETS2_B		0.002255	0.5931	0.1977	1	11	868	TYROBP,ARHGDIB,PTPN6,PSAP,FCER1G,FCGR2B,SH3KBP1,NCF2,NCF4,LCP1,CTSS
	C8	Transcription Factor Binding Site	MGGAAGTG_V$GABP_B	MGGAAGTG_V$GABP_B		0.004796	1.261	0.3154	1	8	560	BMP2K,TRPV2,OSTF1,LCP1,LCP2,ARPC4,CTSS,LAPTM5
	C8	Transcription Factor Binding Site	TCANNTGAY_V$SREBP1_01	TCANNTGAY_V$SREBP1_01		0.009053	2.381	0.3223	1	6	378	HEXA,ATP6V0C,PSAP,LCP1,CTSD,CTSS
	C9	GO: Biological Process	GO:0060429	epithelium development		1.144e-11	4.663e-08	4.663e-08	4.146e-07	53	1110	SOX9,PRSS8,CRLF1,PDGFA,SPINT1,GATA6,ETV5,MECOM,TST,FOXA1,FOXA2,GRHL2,PHGDH,IQGAP1,GJA1,FREM2,GPC3,F11R,ZNRF3,KLF5,CGN,FGF1,HES1,FGFR2,SDC1,SDC4,KRAS,EZR,SEMA3C,FRAS1,FOXP2,DSP,ANXA1,ANXA4,ICAM1,SHH,LAMA3,ID2,LAMA5,LAMB3,LAMC2,IRX1,EDN3,PDPN,COL18A1,CELSR1,BCL11B,IGFBP5,ELF3,CDH1,EPCAM,CTSH,COQ7
	C9	GO: Biological Process	GO:0030324	lung development		1.732e-09	7.061e-06	1.98e-06	1.76e-05	19	199	SOX9,PDGFA,HOPX,CFTR,GATA6,FOXA1,FOXA2,GRHL2,GPC3,FGF1,HES1,FGFR2,KRAS,FOXP2,SHH,LAMA5,PDPN,CELSR1,CTSH
	C9	GO: Biological Process	GO:0007155	cell adhesion		2.307e-08	9.406e-05	9.406e-06	8.363e-05	45	1067	SOX9,CLDN18,ERBB3,GPR56,FOXA1,FOXA2,ITGB6,FREM2,TINAG,CADM1,PTPRF,F11R,AGER,ADAMTS18,HES1,ALCAM,SDC4,EZR,COL4A6,DPP4,DSG2,DSP,ICAM1,LAMA3,LAMA5,LAMB3,LAMC2,CLDN4,CLDN3,CLDN7,CLDN6,EGFL6,PDPN,COL18A1,CELSR1,CD9,LMO7,ASS1,BCAM,CTNND2,MPZL2,ATP1B1,CDH1,EPCAM,MIA
	C9	GO: Biological Process	GO:0070830	tight junction assembly		2.014e-06	0.008212	0.0003356	0.002983	8	50	CLDN18,ACTN4,GJA1,F11R,CGN,CRB3,NEDD4L,CDH1
	C9	GO: Biological Process	GO:0051726	regulation of cell cycle		5.752e-06	0.02345	0.0007106	0.006317	34	860	CDKN1C,SOX9,PSMA2,ECD,PSMB6,GATA6,MECOM,PSME1,FOXA1,UBE2B,GADD45G,AK1,HES1,FGFR2,COPS5,ANXA1,TOM1L1,ID2,DYNLT3,MSH2,EDN3,RPS27L,CCND2,CDC37,PDPN,PLA2G16,HMGA2,SMC3,PEBP1,ASNS,ZFHX3,MUC1,CDK4,CDK7
	C9	GO: Cellular Component	GO:0045177	apical part of cell		9.657e-09	4.732e-06	2.366e-06	1.602e-05	25	380	ERBB3,CFTR,GJA1,STXBP2,CLCN3,MGST1,KCNK1,CRB3,EZR,DPP4,DSG2,ANXA4,ANO1,CLDN4,PDPN,MAL2,IGFBP2,CD9,LMO7,PEBP1,ATP1B1,MUC1,CDH1,MYL12B,EPCAM
	C9	GO: Cellular Component	GO:0098589	membrane region		3.771e-08	1.848e-05	4.619e-06	3.129e-05	51	1326	LPCAT1,ERBB3,CFTR,SPCS2,SSR2,DPM2,ACSL4,GJA1,RAB9A,CADM1,STXBP2,CLCN3,MGST1,PIGH,AGER,PGAP2,CYB5R3,KCNK1,CRB3,TMED10,GNB1,TMCO1,PLP2,FKBP4,EZR,DPP4,AKAP5,DSG2,DSP,ANXA1,ANXA4,CANX,NUCB2,ANO1,CLDN4,CLDN7,TMED4,PDPN,MAL2,ORMDL1,BCAP31,C14orf1,IGFBP2,CD9,SLCO4C1,ORMDL2,LMO7,ATP1B1,MUC1,CDH1,EPCAM
	C9	GO: Cellular Component	GO:0031410	cytoplasmic vesicle		2.256e-07	0.0001106	1.382e-05	9.359e-05	45	1163	ABCA3,PDGFA,ARRDC1,COPE,CFTR,ACTN4,WLS,MYO5C,GJA1,RAB9A,CADM1,ATP8A1,STXBP2,CLCN3,F11R,CLU,BSG,SNX7,TRAPPC4,FGFR2,TMED10,COPS5,DPP4,RAB25,SNX24,SFTPB,SFTPC,CANX,AP1M2,SHH,GPRC5A,RAB11FIP1,PPIB,PDIA3,TFRC,BCAP31,C14orf1,IGFBP2,CD9,PEBP1,LGI3,TMSB4X,VAMP8,CTSH,SNX22
	C9	GO: Cellular Component	GO:0005911	cell-cell junction		5.03e-07	0.0002464	2.464e-05	0.0001669	22	373	CLDN18,ACTN4,IQGAP1,GJA1,CADM1,F11R,CGN,CRB3,DPP4,KRT8,DSG2,DSP,LAMA3,CLDN4,CLDN3,CLDN7,CLDN6,LMO7,CGNL1,CDH1,EPCAM,CDK4
	C9	GO: Cellular Component	GO:0097208	alveolar lamellar body		9.811e-06	0.004808	0.0002828	0.001915	4	9	ABCA3,SFTPB,SFTPC,CTSH
	C9	Mouse Phenotype	MP:0006382	abnormal lung epithelium morphology		1.886e-07	0.0006164	0.0006164	0.005344	14	104	SOX9,ABCA3,HOPX,HES1,KRAS,FRAS1,NEDD4L,SFTPB,SFTPC,SHH,NPC2,PDPN,CELSR1,LMO7
	C9	Mouse Phenotype	MP:0001175	abnormal lung morphology		1.378e-05	0.04505	0.009617	0.08337	28	482	SOX9,LPCAT1,ABCA3,PDGFA,HOPX,CFTR,GRHL2,ITGB6,FREM2,GPC3,NFE2L2,HES1,FGFR2,KRAS,FRAS1,NEDD4L,SFTPB,SFTPC,ANO1,SHH,LAMA5,NPC2,LDHA,PDPN,CELSR1,CD9,EGR1,LMO7
	C9	Mouse Phenotype	MP:0002080	prenatal lethality		4.858e-05	0.1588	0.0161	0.1396	71	1918	TPM3,TANC2,SOX9,ERBB3,PRSS8,ABCA3,PDGFA,CCT3,SPINT1,HOPX,GATA6,ETV5,HMGN1,MDH1,WLS,FOXA2,GRHL2,PHGDH,GJA1,FREM2,UBE2B,FBN2,F11R,BSG,NFE2L2,KLF5,PKM,HES1,FGFR2,TMED10,GNB1,COPS5,FKBP4,KRAS,KRT8,FRAS1,KRT18,DSG2,DSP,KRT19,PPP1R14C,GLRX3,SHH,PON3,LAMA5,APLP2,LDHA,PDIA3,TFAM,TFRC,CCND2,PDPN,GTF2A1,LSR,CELSR1,SPINT2,RQCD1,SMC3,MORF4L2,VPS35,RLIM,UHRF1,ZFHX3,ELF3,CDH1,ENO1,EPCAM,COQ7,CDK4,CDK7,TPI1
	C9	Mouse Phenotype	MP:0004782	abnormal surfactant physiology		5.116e-05	0.1672	0.0161	0.1396	7	41	LPCAT1,ABCA3,HOPX,SFTPB,SFTPC,NPC2,CTSH
	C9	Mouse Phenotype	MP:0004881	abnormal lung size		9.778e-05	0.3195	0.0213	0.1847	12	134	SOX9,ABCA3,GPC3,NFE2L2,HES1,FGFR2,KRAS,SHH,LAMA5,NPC2,LDHA,CELSR1
	C9	Pathway	477132	Cell-Cell communication	BioSystems: REACTOME	4.822e-08	6.707e-05	6.533e-05	0.0005106	15	131	CLDN18,ACTN4,IQGAP1,CADM1,F11R,CRB3,LAMA3,LAMB3,LAMC2,CLDN4,CLDN3,CLDN7,CLDN6,MAPK13,CDH1
	C9	Pathway	160966	Cell junction organization	BioSystems: REACTOME	9.394e-08	0.0001307	6.533e-05	0.0005106	12	84	CLDN18,CADM1,F11R,CRB3,LAMA3,LAMB3,LAMC2,CLDN4,CLDN3,CLDN7,CLDN6,CDH1
	C9	Pathway	198814	Glycolysis and Gluconeogenesis	BioSystems: WikiPathways	4.938e-06	0.006869	0.0009813	0.007669	8	49	PDHB,MDH1,MDH2,PKM,LDHA,LDHB,ENO1,TPI1
	C9	Pathway	83069	Cell adhesion molecules (CAMs)	BioSystems: KEGG	7.336e-06	0.0102	0.001275	0.009968	13	147	CLDN18,CADM1,PTPRF,F11R,ALCAM,SDC1,SDC4,ICAM1,CLDN4,CLDN3,CLDN7,CLDN6,CDH1
	C9	Pathway	906029	Laminin interactions	BioSystems: REACTOME	7.597e-05	0.1057	0.007548	0.05899	5	23	LAMA3,LAMA5,LAMB3,LAMC2,COL18A1
	C9	Transcription Factor Binding Site	CAGGTG_V$E12_Q6	CAGGTG_V$E12_Q6		0.000233	0.1338	0.0861	0.5968	68	1956	TPM3,CDKN1C,EPS8,ERBB3,CRLF1,PDGFA,ARRDC1,DLK1,HMGA1,PSME1,MDH2,FOXA1,PLEKHB1,ITGB6,IQGAP1,ACSL4,STXBP2,GADD45G,PGAP2,ARHGAP44,KCNK1,CRB3,FGF1,ALCAM,RBM47,PLP2,SDC1,SDC4,KRT8,RAB25,DSTN,NEDD4L,DSG2,SFTPC,DSP,KRT19,PPP1R14C,CANX,TOM1L1,AP1M2,SHH,GRB7,LAMA5,LAMC2,CLDN3,CLDN7,USP46,CCDC6,CLDN6,TFRC,IVNS1ABP,PLA2G16,COL18A1,BCL11B,SPINT2,CD9,IGFBP5,SLCO4C1,RQCD1,ORMDL2,ZFHX3,FUCA2,ATOX1,ATP1B1,CDH1,E…
	C9	Transcription Factor Binding Site	TTCNRGNNNNTTC_V$HSF_Q6	TTCNRGNNNNTTC_V$HSF_Q6		0.000396	0.2273	0.0861	0.5968	10	117	GATA6,MECOM,UBE2B,FKBP4,HSPE1,ABHD2,CANX,SLC15A2,MORF4L2,FOXP1
	C9	Transcription Factor Binding Site	CAGGTA_V$AREB6_01	CAGGTA_V$AREB6_01		0.00045	0.2583	0.0861	0.5968	29	642	CRLF1,PDGFA,ETV5,FOXA1,ITGB6,PTP4A1,CLCN3,GPC3,PTPRF,KLF5,AGER,ARHGAP44,KCNK1,RBM47,KRT8,NEDD4L,FOXP2,LAMA3,LAMB3,BCL11B,HMGA2,IGFBP5,ORMDL2,RLIM,EIF5,FOXP1,AVPI1,VAMP8,MIA
	C9	Transcription Factor Binding Site	WGGAATGY_V$TEF1_Q6	WGGAATGY_V$TEF1_Q6		0.001703	0.9776	0.1629	1	16	299	CRLF1,PDGFA,HMGA1,PGAP2,CGN,FGFR2,RBM47,COL4A5,COL4A6,FOXP2,DSP,ID2,LAMB3,LAMC2,ELF3,AVPI1
	C9	Transcription Factor Binding Site	TGANTCA_V$AP1_C	TGANTCA_V$AP1_C		0.008038	4.614	0.3789	1	33	919	ETV5,GPR56,MECOM,ACTN4,HMGA1,FOXA1,PTP4A1,ACSL4,GJA1,TINAG,GPC3,GADD45G,KLF5,KCNK1,PKM,CRB3,FGF1,PLP2,TBL1X,KRT8,DSTN,SFTPC,KRT19,ABHD2,LAMA3,LAMB3,LAMC2,EDN3,LGI3,MPZL2,ATP1B1,ENO1,SLC6A14

## Sheet: Diff Expr Gene List
	Cluster Specific Differentially Expressed Genes
	ENSEMBL ID	GENE SYMBOL	P-VALUE	CLUSTER		CLUSTER	# DiffExpr Genes	Criterion
	ENSMUSG00000054717	Hmgb2	1.38078e-06	C1		C1	112	p-value<0.01
	ENSMUSG00000028832	Stmn1	2.48714e-05	C1		C2	37	p-value<0.01
	ENSMUSG00000023004	Tuba1b	2.91334e-05	C1		C3	39	p-value<0.03
	ENSMUSG00000027379	Bub1	3.70329e-05	C1		C4	156	p-value<0.01
	ENSMUSG00000037894	H2afz	5.20299e-05	C1		C5	171	p-value<0.01
	ENSMUSG00000028312	Smc2	9.5511e-05	C1		C6	106	p-value<0.01
	ENSMUSG00000001473	Tubb6	0.000130109	C1		C7	147	p-value<0.01
	ENSMUSG00000039103	Nexn	0.000138112	C1		C8	64	p-value<0.01
	ENSMUSG00000040204	2810417H13Rik	0.000150728	C1		C9	342	p-value<0.01
	ENSMUSG00000060572	Mfap2	0.000226911	C1
	ENSMUSG00000022261	Sdc2	0.000273983	C1
	ENSMUSG00000001525	Tubb5	0.000274298	C1
	ENSMUSG00000066551	Hmgb1	0.000303275	C1
	ENSMUSG00000020808	Fam64a	0.00040208	C1
	ENSMUSG00000045328	Cenpe	0.000413167	C1
	ENSMUSG00000062248	Cks2	0.0004371	C1
	ENSMUSG00000023919	Cenpq	0.000458823	C1
	ENSMUSG00000031004	Mki67	0.000526028	C1
	ENSMUSG00000020914	Top2a	0.000540423	C1
	ENSMUSG00000072235	Tuba1a	0.000636543	C1
	ENSMUSG00000027715	Ccna2	0.000741604	C1
	ENSMUSG00000027306	Nusap1	0.000816827	C1
	ENSMUSG00000023505	Cdca3	0.00081873	C1
	ENSMUSG00000017716	Birc5	0.000850953	C1
	ENSMUSG00000059005	Hnrnpa3	0.000859032	C1
	ENSMUSG00000041773	Enc1	0.000939031	C1
	ENSMUSG00000029177	Cenpa	0.000947814	C1
	ENSMUSG00000015880	Ncapg	0.000960463	C1
	ENSMUSG00000018604	Tbx3	0.00101548	C1
	ENSMUSG00000054072	Iigp1	0.00115843	C1
	ENSMUSG00000059534	Uqcr10	0.0011766	C1
	ENSMUSG00000022322	Shcbp1	0.00125653	C1
	ENSMUSG00000027239	Mdk	0.00130827	C1
	ENSMUSG00000042834	Nrep	0.00139827	C1
	ENSMUSG00000041126	H2afv	0.00139925	C1
	ENSMUSG00000046341	Gm11223	0.00163755	C1
	ENSMUSG00000041431	Ccnb1	0.00169216	C1
	ENSMUSG00000022360	Atad2	0.00173064	C1
	ENSMUSG00000038943	Prc1	0.00178473	C1
	ENSMUSG00000034906	Ncaph	0.00198429	C1
	ENSMUSG00000068101	Cenpm	0.00216009	C1
	ENSMUSG00000015217	Hmgb3	0.00219305	C1
	ENSMUSG00000076437	2700094K13Rik	0.00226918	C1
	ENSMUSG00000036768	Kif15	0.00231247	C1
	ENSMUSG00000037313	Tacc3	0.00242118	C1
	ENSMUSG00000012443	Kif11	0.00252979	C1
	ENSMUSG00000022881	Rfc4	0.00267859	C1
	ENSMUSG00000023940	Sgol1	0.00268876	C1
	ENSMUSG00000020492	Ska2	0.00289518	C1
	ENSMUSG00000020330	Hmmr	0.00315139	C1
	ENSMUSG00000020608	Smc6	0.00329248	C1
	ENSMUSG00000003778	Brd8	0.00336498	C1
	ENSMUSG00000036752	Tubb4b	0.00342368	C1
	ENSMUSG00000027496	Aurka	0.00349834	C1
	ENSMUSG00000058290	Espl1	0.00355164	C1
	ENSMUSG00000048327	Ckap2l	0.00362696	C1
	ENSMUSG00000032178	Ilf3	0.00373504	C1
	ENSMUSG00000039128	Cdc123	0.00373788	C1
	ENSMUSG00000005233	Spc25	0.00400923	C1
	ENSMUSG00000030677	Kif22	0.00414349	C1
	ENSMUSG00000025289	Prdx4	0.00415417	C1
	ENSMUSG00000034349	Smc4	0.0042248	C1
	ENSMUSG00000020180	Snrpd3	0.0042953	C1
	ENSMUSG00000074476	Spc24	0.0043046	C1
	ENSMUSG00000029430	Ran	0.0044418	C1
	ENSMUSG00000021377	Dek	0.00458714	C1
	ENSMUSG00000030978	Rrm1	0.00469466	C1
	ENSMUSG00000032218	Ccnb2	0.00500655	C1
	ENSMUSG00000001016	Ilf2	0.00506004	C1
	ENSMUSG00000032254	Kif23	0.00516748	C1
	ENSMUSG00000037149	Ddx1	0.00520324	C1
	ENSMUSG00000002732	Fkbp7	0.00553154	C1
	ENSMUSG00000024660	Incenp	0.00557891	C1
	ENSMUSG00000024414	Mrpl27	0.00559102	C1
	ENSMUSG00000021395	Spin1	0.00561582	C1
	ENSMUSG00000000094	Tbx4	0.00574246	C1
	ENSMUSG00000020186	Csrp2	0.00584675	C1
	ENSMUSG00000020018	Snrpf	0.00604522	C1
	ENSMUSG00000020949	Fkbp3	0.00615018	C1
	ENSMUSG00000031245	Hmgn5	0.00622068	C1
	ENSMUSG00000057367	Birc2	0.00640299	C1
	ENSMUSG00000029910	Mad2l1	0.00642868	C1
	ENSMUSG00000019942	Cdk1	0.00673359	C1
	ENSMUSG00000001517	Foxm1	0.00677465	C1
	ENSMUSG00000027469	Tpx2	0.00759061	C1
	ENSMUSG00000061615	Hist1h2ab	0.00764681	C1
	ENSMUSG00000028648	Ndufs5	0.00773763	C1
	ENSMUSG00000039197	Adk	0.00776564	C1
	ENSMUSG00000021614	Vcan	0.0078891	C1
	ENSMUSG00000064325	Hhip	0.00789778	C1
	ENSMUSG00000027160	Ccdc34	0.00791296	C1
	ENSMUSG00000015165	Hnrnpl	0.00797537	C1
	ENSMUSG00000036402	Gng12	0.00807978	C1
	ENSMUSG00000030772	Dkk3	0.00817183	C1
	ENSMUSG00000020415	Pttg1	0.00841725	C1
	ENSMUSG00000043091	Tuba1c	0.008426	C1
	ENSMUSG00000031167	Rbm3	0.00843329	C1
	ENSMUSG00000002059	Rab34	0.0085728	C1
	ENSMUSG00000012483	Rpa3	0.00863152	C1
	ENSMUSG00000038379	Ttk	0.00873483	C1
	ENSMUSG00000036777	Anln	0.00884781	C1
	ENSMUSG00000001403	Ube2c	0.00899453	C1
	ENSMUSG00000036223	Ska1	0.00920848	C1
	ENSMUSG00000046982	Tshz1	0.00925828	C1
	ENSMUSG00000068220	Lgals1	0.0093183	C1
	ENSMUSG00000005698	Ctcf	0.00944211	C1
	ENSMUSG00000039231	Suv39h1	0.00958466	C1
	ENSMUSG00000032783	Troap	0.00961973	C1
	ENSMUSG00000029231	Pdgfra	0.00965332	C1
	ENSMUSG00000041133	Smc1a	0.00973422	C1
	ENSMUSG00000020973	Dnaaf2	0.0098316	C1
	ENSMUSG00000037892	Pcdh18	0.00988466	C1
	ENSMUSG00000022122	Ednrb	1.29378e-05	C2
	ENSMUSG00000056481	Cd248	0.000136638	C2
	ENSMUSG00000042834	Nrep	0.000150259	C2
	ENSMUSG00000060572	Mfap2	0.000330857	C2
	ENSMUSG00000035493	Tgfbi	0.000367062	C2
	ENSMUSG00000020053	Igf1	0.000415952	C2
	ENSMUSG00000022883	Robo1	0.000511642	C2
	ENSMUSG00000022816	Fstl1	0.00160635	C2
	ENSMUSG00000030218	Mgp	0.00179083	C2
	ENSMUSG00000067818	Myl9	0.00187327	C2
	ENSMUSG00000067786	Nnat	0.00236703	C2
	ENSMUSG00000001270	Ckb	0.00251114	C2
	ENSMUSG00000037712	Fermt2	0.00295417	C2
	ENSMUSG00000026360	Rgs2	0.00319018	C2
	ENSMUSG00000000031	H19	0.00321002	C2
	ENSMUSG00000022010	Tsc22d1	0.00322214	C2
	ENSMUSG00000022032	Scara5	0.00329621	C2
	ENSMUSG00000041773	Enc1	0.00352994	C2
	ENSMUSG00000029761	Cald1	0.00375964	C2
	ENSMUSG00000032366	Tpm1	0.00404622	C2
	ENSMUSG00000060548	Tnfrsf19	0.00416303	C2
	ENSMUSG00000030222	Rerg	0.00429242	C2
	ENSMUSG00000024380	Gypc	0.00458032	C2
	ENSMUSG00000018819	Lsp1	0.0046702	C2
	ENSMUSG00000074054	AC124170.2	0.00474486	C2
	ENSMUSG00000039116	Gpr126	0.00531839	C2
	ENSMUSG00000039115	Itga9	0.00624546	C2
	ENSMUSG00000071708	Sms	0.00655941	C2
	ENSMUSG00000040102	Klhl42	0.00715432	C2
	ENSMUSG00000055737	Ghr	0.00717147	C2
	ENSMUSG00000032702	Kank1	0.00745354	C2
	ENSMUSG00000032085	Tagln	0.0075353	C2
	ENSMUSG00000018263	Tbx5	0.00757479	C2
	ENSMUSG00000029231	Pdgfra	0.00758684	C2
	ENSMUSG00000034714	Ttyh2	0.00848257	C2
	ENSMUSG00000024431	Nr3c1	0.00870443	C2
	ENSMUSG00000028496	Mllt3	0.00984072	C2
	ENSMUSG00000027523	Gnas	0.00316656	C3
	ENSMUSG00000024304	Cdh2	0.00544176	C3
	ENSMUSG00000027750	Postn	0.00583511	C3
	ENSMUSG00000057098	Ebf1	0.00602543	C3
	ENSMUSG00000009876	Cox4i2	0.00616631	C3
	ENSMUSG00000019432	Ddx39b	0.00685997	C3
	ENSMUSG00000033910	Gucy1a3	0.00694234	C3
	ENSMUSG00000024620	Pdgfrb	0.00833966	C3
	ENSMUSG00000026678	Rgs5	0.00887958	C3
	ENSMUSG00000038146	Notch3	0.00963847	C3
	ENSMUSG00000072235	Tuba1a	0.0103138	C3
	ENSMUSG00000069662	Marcks	0.0104219	C3
	ENSMUSG00000040158	Tax1bp3	0.0116062	C3
	ENSMUSG00000017466	Timp2	0.012563	C3
	ENSMUSG00000031239	Itm2a	0.0132826	C3
	ENSMUSG00000026918	Brd3	0.0136398	C3
	ENSMUSG00000048376	F2r	0.0149952	C3
	ENSMUSG00000032766	Gng11	0.0157264	C3
	ENSMUSG00000029076	Sdf4	0.0164126	C3
	ENSMUSG00000024538	Ppic	0.0165083	C3
	ENSMUSG00000029761	Cald1	0.0166441	C3
	ENSMUSG00000030551	Nr2f2	0.0167064	C3
	ENSMUSG00000072772	Grcc10	0.0175857	C3
	ENSMUSG00000002844	Adprh	0.0180591	C3
	ENSMUSG00000041329	Atp1b2	0.0191712	C3
	ENSMUSG00000002602	Axl	0.0193896	C3
	ENSMUSG00000040856	Dlk1	0.0236445	C3
	ENSMUSG00000039221	Rpl22l1	0.0237922	C3
	ENSMUSG00000022178	Ajuba	0.0241328	C3
	ENSMUSG00000025980	Hspd1	0.02485	C3
	ENSMUSG00000070469	Adamtsl3	0.0253752	C3
	ENSMUSG00000018326	Ywhab	0.0266908	C3
	ENSMUSG00000022197	Pdzd2	0.0278907	C3
	ENSMUSG00000062797	l7Rn6	0.0283832	C3
	ENSMUSG00000068220	Lgals1	0.0285663	C3
	ENSMUSG00000020277	Pfkl	0.0287671	C3
	ENSMUSG00000031502	Col4a1	0.0293175	C3
	ENSMUSG00000002881	Nab1	0.0297429	C3
	ENSMUSG00000033792	Atp7a	0.0299848	C3
	ENSMUSG00000028649	Macf1	2.94102e-09	C5
	ENSMUSG00000045680	Tcf21	3.41165e-09	C5
	ENSMUSG00000042436	Mfap4	1.39297e-08	C5
	ENSMUSG00000023092	Fhl1	1.54871e-08	C5
	ENSMUSG00000031380	Figf	3.88403e-08	C5
	ENSMUSG00000027962	Vcam1	2.96876e-07	C5
	ENSMUSG00000019528	Gyg	6.39165e-07	C5
	ENSMUSG00000048126	Col6a3	8.32875e-07	C5
	ENSMUSG00000028413	B4galt1	8.5233e-07	C5
	ENSMUSG00000031170	Slc38a5	9.17003e-07	C5
	ENSMUSG00000001506	Col1a1	1.80665e-06	C5
	ENSMUSG00000028517	Ppap2b	1.98152e-06	C5
	ENSMUSG00000009633	G0s2	2.29356e-06	C5
	ENSMUSG00000055435	Maf	2.76742e-06	C5
	ENSMUSG00000053702	Nebl	2.82157e-06	C5
	ENSMUSG00000018217	Pmp22	2.88762e-06	C5
	ENSMUSG00000026043	Col3a1	4.45354e-06	C5
	ENSMUSG00000029860	Zyx	5.58988e-06	C5
	ENSMUSG00000031375	Bgn	6.48586e-06	C5
	ENSMUSG00000031673	Cdh11	7.00771e-06	C5
	ENSMUSG00000037736	Limch1	7.75026e-06	C5
	ENSMUSG00000027848	Olfml3	8.13018e-06	C5
	ENSMUSG00000020241	Col6a2	1.33788e-05	C5
	ENSMUSG00000016194	Hsd11b1	1.79923e-05	C5
	ENSMUSG00000040562	Gstm2	1.96782e-05	C5
	ENSMUSG00000024063	Lbh	2.63872e-05	C5
	ENSMUSG00000026193	Fn1	3.02948e-05	C5
	ENSMUSG00000073651	Tns1	3.47504e-05	C5
	ENSMUSG00000030551	Nr2f2	3.67748e-05	C5
	ENSMUSG00000026042	Col5a2	3.93877e-05	C5
	ENSMUSG00000031246	Sh3bgrl	5.76123e-05	C5
	ENSMUSG00000047963	Stbd1	5.78063e-05	C5
	ENSMUSG00000036144	Meox2	6.42682e-05	C5
	ENSMUSG00000040170	Fmo2	6.78851e-05	C5
	ENSMUSG00000037166	Ppp1r14a	7.42568e-05	C5
	ENSMUSG00000036103	Colec12	8.37433e-05	C5
	ENSMUSG00000074074	AU023434	9.15634e-05	C5
	ENSMUSG00000021390	Ogn	9.47379e-05	C5
	ENSMUSG00000024924	Vldlr	9.48022e-05	C5
	ENSMUSG00000022371	Col14a1	9.74189e-05	C5
	ENSMUSG00000031490	Eif4ebp1	9.83799e-05	C5
	ENSMUSG00000021732	Fgf10	0.000109933	C5
	ENSMUSG00000037826	Ppm1k	0.000133375	C5
	ENSMUSG00000026879	Gsn	0.000137255	C5
	ENSMUSG00000004451	Ralb	0.000179149	C5
	ENSMUSG00000010797	Wnt2	0.00018491	C5
	ENSMUSG00000028248	Sfrs18	0.000190876	C5
	ENSMUSG00000023224	Serping1	0.000190886	C5
	ENSMUSG00000022676	Snai2	0.000228644	C5
	ENSMUSG00000028369	Svep1	0.000257978	C5
	ENSMUSG00000024600	Slc27a6	0.000289234	C5
	ENSMUSG00000018339	Gpx3	0.000329559	C5
	ENSMUSG00000038668	Lpar1	0.000393699	C5
	ENSMUSG00000024529	Lox	0.000410949	C5
	ENSMUSG00000028024	Enpep	0.000419337	C5
	ENSMUSG00000056870	Gulp1	0.000429305	C5
	ENSMUSG00000027204	Fbn1	0.000447606	C5
	ENSMUSG00000026701	Prdx6	0.00048553	C5
	ENSMUSG00000022951	Rcan1	0.00051801	C5
	ENSMUSG00000025151	Maged1	0.000591555	C5
	ENSMUSG00000027253	Lrp4	0.00059226	C5
	ENSMUSG00000058897	Col25a1	0.000595592	C5
	ENSMUSG00000038156	Spon1	0.00064316	C5
	ENSMUSG00000032766	Gng11	0.000655461	C5
	ENSMUSG00000038587	Akap12	0.000660215	C5
	ENSMUSG00000020900	Myh10	0.000665109	C5
	ENSMUSG00000020264	Slc36a2	0.000689294	C5
	ENSMUSG00000029675	Eln	0.000743308	C5
	ENSMUSG00000029718	Pcolce	0.000768504	C5
	ENSMUSG00000030861	Acadsb	0.000769669	C5
	ENSMUSG00000024601	Isoc1	0.000822146	C5
	ENSMUSG00000058806	Col13a1	0.000839375	C5
	ENSMUSG00000033444	Specc1l	0.000840254	C5
	ENSMUSG00000001119	Col6a1	0.000852817	C5
	ENSMUSG00000026748	Plxdc2	0.000868417	C5
	ENSMUSG00000046402	Rbp1	0.000902934	C5
	ENSMUSG00000024953	Prdx5	0.00104414	C5
	ENSMUSG00000026574	Dpt	0.00104818	C5
	ENSMUSG00000028494	Plin2	0.00109685	C5
	ENSMUSG00000030782	Tgfb1i1	0.00113243	C5
	ENSMUSG00000065954	Tacc1	0.00119474	C5
	ENSMUSG00000022228	Zscan26	0.00122443	C5
	ENSMUSG00000059049	Frem1	0.00123415	C5
	ENSMUSG00000017652	Cd40	0.00124239	C5
	ENSMUSG00000006219	Fblim1	0.00128717	C5
	ENSMUSG00000074570	Cass4	0.00146397	C5
	ENSMUSG00000039607	Rbms3	0.0015209	C5
	ENSMUSG00000002107	Celf2	0.00155652	C5
	ENSMUSG00000032340	Neo1	0.00160784	C5
	ENSMUSG00000001986	Gria3	0.00160807	C5
	ENSMUSG00000019278	Dpep1	0.0016164	C5
	ENSMUSG00000022836	Mylk	0.0017227	C5
	ENSMUSG00000025268	Maged2	0.00173057	C5
	ENSMUSG00000024781	Lipa	0.00182054	C5
	ENSMUSG00000040249	Lrp1	0.00200812	C5
	ENSMUSG00000075408	6030408B16Rik	0.00203278	C5
	ENSMUSG00000022893	Adamts1	0.00206488	C5
	ENSMUSG00000014778	Fhod1	0.00214602	C5
	ENSMUSG00000031558	Slit2	0.00214888	C5
	ENSMUSG00000029096	Htra3	0.00226242	C5
	ENSMUSG00000028351	Dbc1	0.00243116	C5
	ENSMUSG00000068874	Selenbp1	0.0025229	C5
	ENSMUSG00000003617	Cp	0.00260779	C5
	ENSMUSG00000058135	Gstm1	0.00266863	C5
	ENSMUSG00000060703	Cd302	0.00273026	C5
	ENSMUSG00000021910	Nisch	0.00273538	C5
	ENSMUSG00000078190	Dnm3os	0.00278904	C5
	ENSMUSG00000027820	Mme	0.0028164	C5
	ENSMUSG00000048960	Prex2	0.00293544	C5
	ENSMUSG00000042190	Cmklr1	0.00306992	C5
	ENSMUSG00000046828	Mettl21e	0.00312815	C5
	ENSMUSG00000029163	Emilin1	0.00313001	C5
	ENSMUSG00000018411	Mapt	0.0031563	C5
	ENSMUSG00000004558	Ndrg2	0.0033244	C5
	ENSMUSG00000020486	Sept4	0.00333351	C5
	ENSMUSG00000026421	Csrp1	0.00344932	C5
	ENSMUSG00000041757	Plekha6	0.00360775	C5
	ENSMUSG00000068877	Selenbp2	0.00361021	C5
	ENSMUSG00000026547	Tagln2	0.00371375	C5
	ENSMUSG00000040998	Npnt	0.00383025	C5
	ENSMUSG00000038503	Mesdc2	0.00395629	C5
	ENSMUSG00000078247	Airn	0.00400203	C5
	ENSMUSG00000078445	AC168276.1	0.00407362	C5
	ENSMUSG00000020676	Ccl11	0.00408716	C5
	ENSMUSG00000001802	Lrp3	0.00411658	C5
	ENSMUSG00000031523	Dlc1	0.00412388	C5
	ENSMUSG00000021559	Dapk1	0.00419632	C5
	ENSMUSG00000043496	Tril	0.00426829	C5
	ENSMUSG00000031616	Ednra	0.00427004	C5
	ENSMUSG00000028980	H6pd	0.00431817	C5
	ENSMUSG00000033022	Cdo1	0.00432333	C5
	ENSMUSG00000022309	Angpt1	0.00439412	C5
	ENSMUSG00000026768	Itga8	0.00439578	C5
	ENSMUSG00000016382	Pls3	0.00447808	C5
	ENSMUSG00000070867	Trabd2b	0.00483016	C5
	ENSMUSG00000058070	Eml1	0.00508767	C5
	ENSMUSG00000054469	Lclat1	0.00546502	C5
	ENSMUSG00000073155	1810058I24Rik	0.00560697	C5
	ENSMUSG00000026365	Cfh	0.00563032	C5
	ENSMUSG00000031740	Mmp2	0.00566985	C5
	ENSMUSG00000025950	Idh1	0.00572936	C5
	ENSMUSG00000029686	Cul1	0.00582107	C5
	ENSMUSG00000026249	Serpine2	0.00600326	C5
	ENSMUSG00000042821	Snai1	0.00633623	C5
	ENSMUSG00000020422	Tns3	0.00650543	C5
	ENSMUSG00000006931	Leprel4	0.00653563	C5
	ENSMUSG00000078607	1810010H24Rik	0.00662797	C5
	ENSMUSG00000002265	Peg3	0.00666688	C5
	ENSMUSG00000032334	Loxl1	0.00670009	C5
	ENSMUSG00000078866	Gm14420	0.00680431	C5
	ENSMUSG00000005360	Slc1a3	0.00681304	C5
	ENSMUSG00000026568	Mpc2	0.00686391	C5
	ENSMUSG00000039168	Dap	0.00690592	C5
	ENSMUSG00000009281	Rarres2	0.00707979	C5
	ENSMUSG00000051811	Cox6b2	0.0071044	C5
	ENSMUSG00000031963	Bmper	0.00717192	C5
	ENSMUSG00000032648	Pygm	0.00724157	C5
	ENSMUSG00000020695	Mrc2	0.0072814	C5
	ENSMUSG00000002289	Angptl4	0.00738994	C5
	ENSMUSG00000023036	Pcdhga11	0.00756453	C5
	ENSMUSG00000036570	Fxyd1	0.00758331	C5
	ENSMUSG00000028420	Tmem38b	0.00801769	C5
	ENSMUSG00000020032	Nuak1	0.00806516	C5
	ENSMUSG00000029070	Mxra8	0.00810461	C5
	ENSMUSG00000023830	Igf2r	0.00855177	C5
	ENSMUSG00000029201	Ugdh	0.0086141	C5
	ENSMUSG00000058351	Smim4	0.00878479	C5
	ENSMUSG00000021127	Zfp36l1	0.00908053	C5
	ENSMUSG00000031021	Tmem9b	0.0090886	C5
	ENSMUSG00000029823	Luc7l2	0.00988895	C5
	ENSMUSG00000020205	Phlda1	0.00994965	C5
	ENSMUSG00000026921	Egfl7	3.25349e-07	C7
	ENSMUSG00000031871	Cdh5	8.80993e-07	C7
	ENSMUSG00000020717	Pecam1	1.48782e-06	C7
	ENSMUSG00000001240	Ramp2	1.81869e-06	C7
	ENSMUSG00000027435	Cd93	5.9923e-06	C7
	ENSMUSG00000037754	Ppp1r16b	1.08132e-05	C7
	ENSMUSG00000047867	Gimap6	1.30627e-05	C7
	ENSMUSG00000033082	Clec1a	1.35526e-05	C7
	ENSMUSG00000062960	Kdr	1.44467e-05	C7
	ENSMUSG00000051855	Mest	2.74703e-05	C7
	ENSMUSG00000049881	2810025M15Rik	6.85431e-05	C7
	ENSMUSG00000074457	S100a16	7.00128e-05	C7
	ENSMUSG00000016494	Cd34	8.06494e-05	C7
	ENSMUSG00000035566	Pcdh17	8.13514e-05	C7
	ENSMUSG00000034845	Plvap	8.91516e-05	C7
	ENSMUSG00000006356	Crip2	0.000102757	C7
	ENSMUSG00000007655	Cav1	0.000116466	C7
	ENSMUSG00000059588	Calcrl	0.000123025	C7
	ENSMUSG00000066571	4931406P16Rik	0.000124547	C7
	ENSMUSG00000032035	Ets1	0.000126407	C7
	ENSMUSG00000020577	Tspan13	0.000139	C7
	ENSMUSG00000054690	Emcn	0.000151845	C7
	ENSMUSG00000047557	Lxn	0.000169927	C7
	ENSMUSG00000045930	Clec14a	0.000184531	C7
	ENSMUSG00000024451	Arap3	0.000194859	C7
	ENSMUSG00000054435	Gimap4	0.000198127	C7
	ENSMUSG00000073599	Ecscr	0.000291513	C7
	ENSMUSG00000027074	Slc43a3	0.000353043	C7
	ENSMUSG00000038543	BC028528	0.000377596	C7
	ENSMUSG00000032966	Fkbp1a	0.000408389	C7
	ENSMUSG00000031502	Col4a1	0.000410466	C7
	ENSMUSG00000033191	Tie1	0.000420644	C7
	ENSMUSG00000034810	Scn7a	0.000438783	C7
	ENSMUSG00000022018	Rgcc	0.000440011	C7
	ENSMUSG00000016087	Fli1	0.000495528	C7
	ENSMUSG00000001029	Icam2	0.000497664	C7
	ENSMUSG00000001946	Esam	0.000575361	C7
	ENSMUSG00000029648	Flt1	0.000596444	C7
	ENSMUSG00000029826	Zc3hav1	0.000609116	C7
	ENSMUSG00000038145	Snrk	0.000622254	C7
	ENSMUSG00000009687	Fxyd5	0.000639454	C7
	ENSMUSG00000071042	Rasgrp3	0.000719653	C7
	ENSMUSG00000039706	Ldb2	0.000788094	C7
	ENSMUSG00000060791	Gmfg	0.000813382	C7
	ENSMUSG00000027111	Itga6	0.000841466	C7
	ENSMUSG00000033960	9430020K01Rik	0.000988114	C7
	ENSMUSG00000068735	Trp53i11	0.00100264	C7
	ENSMUSG00000020357	Flt4	0.00103798	C7
	ENSMUSG00000005672	Kit	0.00108013	C7
	ENSMUSG00000000058	Cav2	0.00112543	C7
	ENSMUSG00000050910	Cdr2l	0.00125641	C7
	ENSMUSG00000046814	Gchfr	0.00127202	C7
	ENSMUSG00000024378	Stard4	0.00127955	C7
	ENSMUSG00000027954	Efna1	0.00140586	C7
	ENSMUSG00000038235	F11r	0.00147826	C7
	ENSMUSG00000041361	Myzap	0.00151568	C7
	ENSMUSG00000053477	Tcf4	0.0015565	C7
	ENSMUSG00000022799	Arhgap31	0.00156063	C7
	ENSMUSG00000039831	Arhgap29	0.00165044	C7
	ENSMUSG00000049929	Lpar4	0.00176298	C7
	ENSMUSG00000022587	Ly6e	0.00184397	C7
	ENSMUSG00000026728	Vim	0.00189622	C7
	ENSMUSG00000044562	Rasip1	0.00199289	C7
	ENSMUSG00000040268	Plekha1	0.001994	C7
	ENSMUSG00000001089	Luzp1	0.00206636	C7
	ENSMUSG00000043505	Gimap5	0.00207009	C7
	ENSMUSG00000004044	Ptrf	0.00220835	C7
	ENSMUSG00000024440	Pcdh12	0.0022572	C7
	ENSMUSG00000059895	Ptp4a3	0.00228576	C7
	ENSMUSG00000041378	Cldn5	0.00229995	C7
	ENSMUSG00000025607	Copg2	0.00246613	C7
	ENSMUSG00000005610	Eif4g2	0.00254117	C7
	ENSMUSG00000044258	Ctla2a	0.00275083	C7
	ENSMUSG00000052560	Cpne8	0.00286148	C7
	ENSMUSG00000078103	AC161518.1	0.00291346	C7
	ENSMUSG00000020444	Guk1	0.00292474	C7
	ENSMUSG00000000317	Bcl6b	0.002937	C7
	ENSMUSG00000029710	Ephb4	0.00297779	C7
	ENSMUSG00000030208	Emp1	0.00301519	C7
	ENSMUSG00000033149	Phldb2	0.00304686	C7
	ENSMUSG00000022579	Gpihbp1	0.00317886	C7
	ENSMUSG00000024238	Zeb1	0.00325493	C7
	ENSMUSG00000008398	Elk3	0.00327989	C7
	ENSMUSG00000041482	Piezo2	0.00330322	C7
	ENSMUSG00000020846	Fam101b	0.00330551	C7
	ENSMUSG00000019647	Sema6a	0.00344752	C7
	ENSMUSG00000028184	Lphn2	0.00350061	C7
	ENSMUSG00000017615	Tnfaip1	0.00367071	C7
	ENSMUSG00000063694	Cycs	0.00372452	C7
	ENSMUSG00000020077	Srgn	0.00377334	C7
	ENSMUSG00000030091	Nup210	0.00385184	C7
	ENSMUSG00000019256	Ahr	0.00387156	C7
	ENSMUSG00000034903	Cobll1	0.00427697	C7
	ENSMUSG00000026447	Pik3c2b	0.00432618	C7
	ENSMUSG00000031681	Smad1	0.00440925	C7
	ENSMUSG00000057530	Ece1	0.00442298	C7
	ENSMUSG00000000266	Mid2	0.00453645	C7
	ENSMUSG00000045377	Tmem88	0.00456098	C7
	ENSMUSG00000020415	Pttg1	0.00465431	C7
	ENSMUSG00000028843	Sh3bgrl3	0.00468101	C7
	ENSMUSG00000020439	Smtn	0.00472048	C7
	ENSMUSG00000030787	Lyve1	0.00487376	C7
	ENSMUSG00000068036	Mllt4	0.00488941	C7
	ENSMUSG00000029309	Sparcl1	0.00500307	C7
	ENSMUSG00000038393	Txnip	0.00507382	C7
	ENSMUSG00000028977	Casz1	0.00517764	C7
	ENSMUSG00000061665	Cd2ap	0.00535163	C7
	ENSMUSG00000032698	Lmo2	0.00537944	C7
	ENSMUSG00000090019	Gimap1	0.00539863	C7
	ENSMUSG00000041445	Mmrn2	0.00544937	C7
	ENSMUSG00000046768	Rhoj	0.00556702	C7
	ENSMUSG00000024030	Abcg1	0.00561646	C7
	ENSMUSG00000039031	Arhgap18	0.0056706	C7
	ENSMUSG00000067925	Cxx1a	0.00575722	C7
	ENSMUSG00000022895	Ets2	0.00583332	C7
	ENSMUSG00000042590	Ipo11	0.00586255	C7
	ENSMUSG00000041959	S100a10	0.006111	C7
	ENSMUSG00000074054	AC124170.2	0.00612564	C7
	ENSMUSG00000022661	Cd200	0.00620301	C7
	ENSMUSG00000026181	Ppm1f	0.00625513	C7
	ENSMUSG00000020681	Ace	0.00632372	C7
	ENSMUSG00000025085	Ablim1	0.00636114	C7
	ENSMUSG00000074364	Ehd2	0.00638272	C7
	ENSMUSG00000058254	Tspan7	0.00647219	C7
	ENSMUSG00000046916	Myct1	0.00656664	C7
	ENSMUSG00000038811	Gngt2	0.00671821	C7
	ENSMUSG00000020154	Ptprb	0.00687221	C7
	ENSMUSG00000001552	Jup	0.00699272	C7
	ENSMUSG00000056492	Gpr116	0.00722021	C7
	ENSMUSG00000034868	Myl12b	0.00727091	C7
	ENSMUSG00000034488	Edil3	0.00736382	C7
	ENSMUSG00000027800	Tm4sf1	0.00756251	C7
	ENSMUSG00000022475	Hdac7	0.00758797	C7
	ENSMUSG00000001123	Lgals9	0.00771426	C7
	ENSMUSG00000045954	Sdpr	0.00777098	C7
	ENSMUSG00000025608	Podxl	0.00796502	C7
	ENSMUSG00000044338	Aplnr	0.00807812	C7
	ENSMUSG00000034037	Fgd5	0.0081936	C7
	ENSMUSG00000002885	Cd97	0.00825813	C7
	ENSMUSG00000015533	Itga2	0.00831457	C7
	ENSMUSG00000062995	Ica1	0.00887762	C7
	ENSMUSG00000028832	Stmn1	0.00908201	C7
	ENSMUSG00000022890	Atp5j	0.00957655	C7
	ENSMUSG00000062098	Btbd3	0.00986791	C7
	ENSMUSG00000052921	Arhgef15	0.00989703	C7
	ENSMUSG00000020570	Sypl	0.00997087	C7
	ENSMUSG00000006589	Aprt	0.00998779	C7
	ENSMUSG00000005142	Man2b1	0.000301819	C8
	ENSMUSG00000016256	Ctsz	0.000455819	C8
	ENSMUSG00000060791	Gmfg	0.000536941	C8
	ENSMUSG00000004266	Ptpn6	0.00056143	C8
	ENSMUSG00000000594	Gm2a	0.000614079	C8
	ENSMUSG00000058715	Fcer1g	0.000631938	C8
	ENSMUSG00000030579	Tyrobp	0.000803543	C8
	ENSMUSG00000033220	Rac2	0.00109378	C8
	ENSMUSG00000006519	Cyba	0.00113414	C8
	ENSMUSG00000028581	Laptm5	0.00127364	C8
	ENSMUSG00000060802	B2m	0.0014422	C8
	ENSMUSG00000030707	Coro1a	0.0015736	C8
	ENSMUSG00000022148	Fyb	0.00193826	C8
	ENSMUSG00000027447	Cst3	0.00200472	C8
	ENSMUSG00000072620	Slfn2	0.00204921	C8
	ENSMUSG00000042129	Rassf4	0.00214194	C8
	ENSMUSG00000076036	Gm22133	0.00214569	C8
	ENSMUSG00000026480	Ncf2	0.00222935	C8
	ENSMUSG00000021998	Lcp1	0.00226689	C8
	ENSMUSG00000025283	Sat1	0.00333933	C8
	ENSMUSG00000021423	Ly86	0.00333965	C8
	ENSMUSG00000007891	Ctsd	0.00335856	C8
	ENSMUSG00000024121	Atp6v0c	0.00337714	C8
	ENSMUSG00000024725	Ostf1	0.00382403	C8
	ENSMUSG00000050708	Ftl1	0.00388406	C8
	ENSMUSG00000015947	Fcgr1	0.00391409	C8
	ENSMUSG00000026656	Fcgr2b	0.00430681	C8
	ENSMUSG00000024621	Csf1r	0.00470811	C8
	ENSMUSG00000049775	Tmsb4x	0.004802	C8
	ENSMUSG00000015340	Cybb	0.00491402	C8
	ENSMUSG00000041836	Ptpre	0.00491637	C8
	ENSMUSG00000062070	Pgk1	0.00502181	C8
	ENSMUSG00000038642	Ctss	0.00536141	C8
	ENSMUSG00000030220	Arhgdib	0.00536792	C8
	ENSMUSG00000018507	Trpv2	0.00538886	C8
	ENSMUSG00000022952	Runx1	0.00575614	C8
	ENSMUSG00000073982	Rhog	0.00577263	C8
	ENSMUSG00000060063	Alox5ap	0.0058282	C8
	ENSMUSG00000025232	Hexa	0.00594437	C8
	ENSMUSG00000035004	Igsf6	0.00650891	C8
	ENSMUSG00000004207	Psap	0.00659047	C8
	ENSMUSG00000034613	Ppm1h	0.00659207	C8
	ENSMUSG00000071715	Ncf4	0.00719967	C8
	ENSMUSG00000074148	Bcl2a1d	0.00751357	C8
	ENSMUSG00000030560	Ctsc	0.00755905	C8
	ENSMUSG00000022587	Ly6e	0.00788047	C8
	ENSMUSG00000034663	Bmp2k	0.0081716	C8
	ENSMUSG00000079293	Clec7a	0.00818714	C8
	ENSMUSG00000015355	Cd48	0.00825956	C8
	ENSMUSG00000026466	Tor1aip1	0.00829005	C8
	ENSMUSG00000040990	Sh3kbp1	0.00840027	C8
	ENSMUSG00000017760	Ctsa	0.00859874	C8
	ENSMUSG00000056069	Fam105a	0.00899685	C8
	ENSMUSG00000075415	Fnbp1	0.00900612	C8
	ENSMUSG00000002985	Apoe	0.00917963	C8
	ENSMUSG00000002699	Lcp2	0.00925152	C8
	ENSMUSG00000030148	Clec4a2	0.00930878	C8
	ENSMUSG00000062593	Lilrb4	0.00931824	C8
	ENSMUSG00000079426	Arpc4	0.00956673	C8
	ENSMUSG00000036908	Unc93b1	0.00957828	C8
	ENSMUSG00000068220	Lgals1	0.00964951	C8
	ENSMUSG00000032554	Trf	0.00972408	C8
	ENSMUSG00000030263	Lrmp	0.00985238	C8
	ENSMUSG00000033685	Ucp2	0.00987241	C8
	ENSMUSG00000070780	Rbm47	1.9837e-08	C9
	ENSMUSG00000049775	Tmsb4x	3.04432e-08	C9
	ENSMUSG00000000303	Cdh1	8.40109e-08	C9
	ENSMUSG00000030342	Cd9	9.28866e-08	C9
	ENSMUSG00000042712	Wbp5	1.40248e-07	C9
	ENSMUSG00000046727	Cystm1	1.47382e-07	C9
	ENSMUSG00000031146	Plp2	2.53428e-07	C9
	ENSMUSG00000017723	Wfdc2	2.67094e-07	C9
	ENSMUSG00000021028	Mbip	2.70479e-07	C9
	ENSMUSG00000023043	Krt18	2.80129e-07	C9
	ENSMUSG00000070473	Cldn3	2.92091e-07	C9
	ENSMUSG00000023175	Bsg	4.33351e-07	C9
	ENSMUSG00000068876	Cgn	4.94006e-07	C9
	ENSMUSG00000015932	Dstn	7.588e-07	C9
	ENSMUSG00000047844	Bex4	7.65936e-07	C9
	ENSMUSG00000032473	Cldn18	9.69627e-07	C9
	ENSMUSG00000018585	Atox1	1.68163e-06	C9
	ENSMUSG00000021242	Npc2	1.78499e-06	C9
	ENSMUSG00000024479	Mal2	2.0518e-06	C9
	ENSMUSG00000032348	Gsta4	2.15809e-06	C9
	ENSMUSG00000032076	Cadm1	2.38669e-06	C9
	ENSMUSG00000000567	Sox9	2.38685e-06	C9
	ENSMUSG00000049382	Krt8	2.53217e-06	C9
	ENSMUSG00000017009	Sdc4	2.74398e-06	C9
	ENSMUSG00000024659	Anxa1	3.55138e-06	C9
	ENSMUSG00000013089	Etv5	3.95667e-06	C9
	ENSMUSG00000033389	Arhgap44	4.44095e-06	C9
	ENSMUSG00000008540	Mgst1	5.67808e-06	C9
	ENSMUSG00000033295	Ptprf	5.78555e-06	C9
	ENSMUSG00000045394	Epcam	6.48084e-06	C9
	ENSMUSG00000034127	Tspan8	8.09252e-06	C9
	ENSMUSG00000074227	Spint2	1.07348e-05	C9
	ENSMUSG00000023906	Cldn6	1.1407e-05	C9
	ENSMUSG00000028378	Ptgr1	1.27486e-05	C9
	ENSMUSG00000089661	Mia	1.42186e-05	C9
	ENSMUSG00000000402	Egfl6	1.5362e-05	C9
	ENSMUSG00000022240	Ctnnd2	2.09877e-05	C9
	ENSMUSG00000032359	Ctsh	2.36203e-05	C9
	ENSMUSG00000030536	Iqgap1	2.8487e-05	C9
	ENSMUSG00000022097	Sftpc	2.97627e-05	C9
	ENSMUSG00000020098	Pcbd1	3.28962e-05	C9
	ENSMUSG00000028583	Pdpn	4.09783e-05	C9
	ENSMUSG00000033590	Myo5c	4.26528e-05	C9
	ENSMUSG00000050071	Bex1	4.43261e-05	C9
	ENSMUSG00000030246	Ldhb	4.83075e-05	C9
	ENSMUSG00000029994	Anxa4	4.90003e-05	C9
	ENSMUSG00000026972	Arrdc1	6.3413e-05	C9
	ENSMUSG00000053398	Phgdh	6.6809e-05	C9
	ENSMUSG00000032294	Pkm	7.20287e-05	C9
	ENSMUSG00000089971	0610010O12Rik	9.14195e-05	C9
	ENSMUSG00000020423	Btg2	0.000101604	C9
	ENSMUSG00000038872	Zfhx3	0.000111274	C9
	ENSMUSG00000020592	Sdc1	0.000111762	C9
	ENSMUSG00000046711	Hmga1	0.000114859	C9
	ENSMUSG00000056758	Hmga2	0.00012764	C9
	ENSMUSG00000005836	Gata6	0.000129764	C9
	ENSMUSG00000034868	Myl12b	0.00013641	C9
	ENSMUSG00000066456	Hmgn3	0.000136849	C9
	ENSMUSG00000031278	Acsl4	0.000155408	C9
	ENSMUSG00000052397	Ezr	0.000163753	C9
	ENSMUSG00000063229	Ldha	0.000183126	C9
	ENSMUSG00000042784	Muc1	0.000183639	C9
	ENSMUSG00000023039	Krt7	0.000188848	C9
	ENSMUSG00000030357	Fkbp4	0.000198105	C9
	ENSMUSG00000027940	Tpm3	0.000226623	C9
	ENSMUSG00000026576	Atp1b1	0.000243256	C9
	ENSMUSG00000018569	Cldn7	0.000244368	C9
	ENSMUSG00000020644	Id2	0.000249189	C9
	ENSMUSG00000050953	Gja1	0.000252244	C9
	ENSMUSG00000029563	Foxp2	0.00025251	C9
	ENSMUSG00000041355	Ssr2	0.000253863	C9
	ENSMUSG00000008601	Rab25	0.000256316	C9
	ENSMUSG00000029064	Gnb1	0.000258007	C9
	ENSMUSG00000046434	Hnrnpa1	0.000266068	C9
	ENSMUSG00000015839	Nfe2l2	0.000270238	C9
	ENSMUSG00000002980	Bcam	0.000305299	C9
	ENSMUSG00000025451	Paip1	0.000318449	C9
	ENSMUSG00000024640	Psat1	0.000320424	C9
	ENSMUSG00000025731	0610011F06Rik	0.000341766	C9
	ENSMUSG00000044986	Tst	0.000346962	C9
	ENSMUSG00000027684	Mecom	0.000363166	C9
	ENSMUSG00000030800	Prss8	0.000367671	C9
	ENSMUSG00000031765	Mt1	0.000369842	C9
	ENSMUSG00000003309	Ap1m2	0.000379598	C9
	ENSMUSG00000062329	Cytl1	0.000398652	C9
	ENSMUSG00000020057	Dram1	0.000416679	C9
	ENSMUSG00000031422	Morf4l2	0.00041771	C9
	ENSMUSG00000032959	Pebp1	0.000418441	C9
	ENSMUSG00000076441	Ass1	0.000433579	C9
	ENSMUSG00000022037	Clu	0.000446194	C9
	ENSMUSG00000031762	Mt2	0.000501793	C9
	ENSMUSG00000047040	Prr15l	0.000509735	C9
	ENSMUSG00000029829	Tmem213	0.000525495	C9
	ENSMUSG00000028393	Alad	0.000534361	C9
	ENSMUSG00000002633	Shh	0.000596898	C9
	ENSMUSG00000022246	Rai14	0.000613587	C9
	ENSMUSG00000063524	Eno1	0.000656563	C9
	ENSMUSG00000063787	Chchd1	0.000756751	C9
	ENSMUSG00000030652	Coq7	0.000779689	C9
	ENSMUSG00000044279	Crb3	0.000780944	C9
	ENSMUSG00000024130	Abca3	0.000794146	C9
	ENSMUSG00000036781	Rps27l	0.00079452	C9
	ENSMUSG00000015093	Clic3	0.000809459	C9
	ENSMUSG00000034994	Eef2	0.000821006	C9
	ENSMUSG00000038235	F11r	0.000821642	C9
	ENSMUSG00000022636	Alcam	0.0008266	C9
	ENSMUSG00000031505	Carkd	0.00083277	C9
	ENSMUSG00000044393	Dsg2	0.000839094	C9
	ENSMUSG00000025871	4833439L19Rik	0.000850203	C9
	ENSMUSG00000006728	Cdk4	0.000872349	C9
	ENSMUSG00000019312	Grb7	0.00091394	C9
	ENSMUSG00000019179	Mdh2	0.000919238	C9
	ENSMUSG00000037685	Atp8a1	0.000949923	C9
	ENSMUSG00000026064	Ptp4a1	0.000979653	C9
	ENSMUSG00000022286	Grhl2	0.000988291	C9
	ENSMUSG00000028173	Wls	0.000999261	C9
	ENSMUSG00000032357	Tinag	0.00100243	C9
	ENSMUSG00000019734	Tmc4	0.00106975	C9
	ENSMUSG00000032383	Ppib	0.00112327	C9
	ENSMUSG00000031176	Dynlt3	0.00112807	C9
	ENSMUSG00000023150	Ivns1abp	0.00114076	C9
	ENSMUSG00000015452	Ager	0.00118309	C9
	ENSMUSG00000052151	Ppap2c	0.00118467	C9
	ENSMUSG00000030849	Fgfr2	0.0012039	C9
	ENSMUSG00000016541	Atxn10	0.00121981	C9
	ENSMUSG00000041126	H2afv	0.00122968	C9
	ENSMUSG00000024598	Fbn2	0.00123799	C9
	ENSMUSG00000059325	Hopx	0.00124196	C9
	ENSMUSG00000041559	Fmod	0.00125393	C9
	ENSMUSG00000054808	Actn4	0.00129272	C9
	ENSMUSG00000032112	Trappc4	0.00132573	C9
	ENSMUSG00000034573	Ptpn13	0.00133468	C9
	ENSMUSG00000047139	Cd24a	0.00138253	C9
	ENSMUSG00000024747	Aldh1a7	0.00138303	C9
	ENSMUSG00000027524	Edn3	0.00150172	C9
	ENSMUSG00000031696	Vps35	0.00150742	C9
	ENSMUSG00000029153	Ociad2	0.00151848	C9
	ENSMUSG00000028536	2610528J11Rik	0.00152852	C9
	ENSMUSG00000054889	Dsp	0.00155002	C9
	ENSMUSG00000033060	Lmo7	0.00157766	C9
	ENSMUSG00000026971	Itgb6	0.00161742	C9
	ENSMUSG00000015647	Lama5	0.00161785	C9
	ENSMUSG00000040653	Ppp1r14c	0.00172185	C9
	ENSMUSG00000048701	Ccdc6	0.00179213	C9
	ENSMUSG00000045691	Thtpa	0.00182102	C9
	ENSMUSG00000018042	Cyb5r3	0.00183761	C9
	ENSMUSG00000007888	Crlf1	0.00190023	C9
	ENSMUSG00000035451	Foxa1	0.00193082	C9
	ENSMUSG00000020541	Tom1l1	0.00195784	C9
	ENSMUSG00000040681	Hmgn1	0.00199193	C9
	ENSMUSG00000038418	Egr1	0.00200279	C9
	ENSMUSG00000046794	Ppp1r3b	0.00210583	C9
	ENSMUSG00000034285	Nipsnap1	0.00211211	C9
	ENSMUSG00000023048	Prr13	0.00213347	C9
	ENSMUSG00000001943	Vsig2	0.00221335	C9
	ENSMUSG00000020911	Krt19	0.00221759	C9
	ENSMUSG00000026479	Lamc2	0.00222853	C9
	ENSMUSG00000015766	Eps8	0.00224779	C9
	ENSMUSG00000024646	Cyb5	0.00229418	C9
	ENSMUSG00000035227	Spcs2	0.00229755	C9
	ENSMUSG00000023456	Tpi1	0.00232108	C9
	ENSMUSG00000033998	Kcnk1	0.00234499	C9
	ENSMUSG00000031145	Prickle3	0.00235545	C9
	ENSMUSG00000021608	Lpcat1	0.00235548	C9
	ENSMUSG00000026185	Igfbp5	0.00235753	C9
	ENSMUSG00000026097	Ormdl1	0.00236538	C9
	ENSMUSG00000038168	Leprel1	0.00240815	C9
	ENSMUSG00000029752	Asns	0.00242814	C9
	ENSMUSG00000001435	Col18a1	0.00248704	C9
	ENSMUSG00000028716	Pdzk1ip1	0.00250083	C9
	ENSMUSG00000067851	Arfgef1	0.00257336	C9
	ENSMUSG00000030990	Pgap2	0.00262031	C9
	ENSMUSG00000022899	Slc15a2	0.00265053	C9
	ENSMUSG00000028780	Sema3c	0.0026734	C9
	ENSMUSG00000022797	Tfrc	0.00270301	C9
	ENSMUSG00000018166	Erbb3	0.0027185	C9
	ENSMUSG00000029759	Pon3	0.00271954	C9
	ENSMUSG00000003051	Elf3	0.00275572	C9
	ENSMUSG00000050732	Vamp8	0.00277911	C9
	ENSMUSG00000037016	Frem2	0.00278912	C9
	ENSMUSG00000003039	Fam32a	0.00283252	C9
	ENSMUSG00000016028	Celsr1	0.00286323	C9
	ENSMUSG00000021243	Fcf1	0.00287573	C9
	ENSMUSG00000025353	Ormdl2	0.00290766	C9
	ENSMUSG00000030067	Foxp1	0.00303939	C9
	ENSMUSG00000004626	Stxbp2	0.0030394	C9
	ENSMUSG00000029552	Tes	0.00305331	C9
	ENSMUSG00000026817	Ak1	0.00305415	C9
	ENSMUSG00000034088	Hdlbp	0.00305886	C9
	ENSMUSG00000027993	Trim2	0.00310396	C9
	ENSMUSG00000054814	Usp46	0.00312269	C9
	ENSMUSG00000037710	Cisd1	0.00318562	C9
	ENSMUSG00000071379	Hpcal1	0.00319586	C9
	ENSMUSG00000021282	Eif5	0.00329643	C9
	ENSMUSG00000037405	Icam1	0.00330014	C9
	ENSMUSG00000020962	Gtf2a1	0.00330802	C9
	ENSMUSG00000002477	Snrpd1	0.00338025	C9
	ENSMUSG00000029103	Lrpap1	0.00338768	C9
	ENSMUSG00000027805	Pfn2	0.00353701	C9
	ENSMUSG00000042842	Serpinb6b	0.0035479	C9
	ENSMUSG00000071632	2510002D24Rik	0.00359031	C9
	ENSMUSG00000047501	Cldn4	0.0035979	C9
	ENSMUSG00000079316	Rab9	0.00363366	C9
	ENSMUSG00000041301	Cftr	0.00372694	C9
	ENSMUSG00000027315	Spint1	0.00372785	C9
	ENSMUSG00000022595	Lypd2	0.00378121	C9
	ENSMUSG00000027248	Pdia3	0.00385138	C9
	ENSMUSG00000034932	Mrpl54	0.00386567	C9
	ENSMUSG00000024589	Nedd4l	0.00392262	C9
	ENSMUSG00000025917	Cops5	0.00394193	C9
	ENSMUSG00000028007	Snx7	0.00397673	C9
	ENSMUSG00000089804	Gm16136	0.00403546	C9
	ENSMUSG00000031996	Aplp2	0.00407248	C9
	ENSMUSG00000020224	Llph	0.00410413	C9
	ENSMUSG00000015671	Psma2	0.0041111	C9
	ENSMUSG00000039323	Igfbp2	0.00414255	C9
	ENSMUSG00000018849	Wwc1	0.00415441	C9
	ENSMUSG00000056537	Rlim	0.00416045	C9
	ENSMUSG00000046733	Gprc5a	0.00420155	C9
	ENSMUSG00000026915	Strbp	0.00424512	C9
	ENSMUSG00000025856	Pdgfa	0.00425343	C9
	ENSMUSG00000060969	Irx1	0.00425539	C9
	ENSMUSG00000007415	Gatad1	0.00433739	C9
	ENSMUSG00000067194	Eif1ax	0.00445212	C9
	ENSMUSG00000031075	Ano1	0.00446208	C9
	ENSMUSG00000004319	Clcn3	0.00455316	C9
	ENSMUSG00000026639	Lamb3	0.00456236	C9
	ENSMUSG00000001783	D10Wsu52e	0.00458643	C9
	ENSMUSG00000021120	Pigh	0.00460873	C9
	ENSMUSG00000075410	Gm11744	0.0046094	C9
	ENSMUSG00000020321	Mdh1	0.00462809	C9
	ENSMUSG00000030701	Plekhb1	0.00474209	C9
	ENSMUSG00000027907	S100a11	0.00477755	C9
	ENSMUSG00000045104	Gm5514	0.00480207	C9
	ENSMUSG00000001247	Lsr	0.00490266	C9
	ENSMUSG00000037031	Tspan15	0.0049129	C9
	ENSMUSG00000000346	Dazap2	0.00508591	C9
	ENSMUSG00000042121	Ssh1	0.00516214	C9
	ENSMUSG00000026174	Rqcd1	0.00520003	C9
	ENSMUSG00000057497	Fam136a	0.00520652	C9
	ENSMUSG00000042510	AA986860	0.00522071	C9
	ENSMUSG00000000031	H19	0.00523189	C9
	ENSMUSG00000031273	Col4a6	0.00525031	C9
	ENSMUSG00000021748	Pdhb	0.00525359	C9
	ENSMUSG00000022551	Cyc1	0.00525765	C9
	ENSMUSG00000033595	Lgi3	0.00530334	C9
	ENSMUSG00000022216	Psme1	0.00544389	C9
	ENSMUSG00000025246	Tbl1x	0.00548283	C9
	ENSMUSG00000035000	Dpp4	0.00554231	C9
	ENSMUSG00000039452	Snx22	0.00555683	C9
	ENSMUSG00000019471	Cdc37	0.00556202	C9
	ENSMUSG00000001416	Cct3	0.00570546	C9
	ENSMUSG00000024974	Smc3	0.00574019	C9
	ENSMUSG00000018286	Psmb6	0.00574843	C9
	ENSMUSG00000041961	Znrf3	0.0057501	C9
	ENSMUSG00000020183	Cpm	0.00576103	C9
	ENSMUSG00000075728	U1	0.00576908	C9
	ENSMUSG00000029551	Psmg3	0.00582054	C9
	ENSMUSG00000037025	Foxa2	0.00588885	C9
	ENSMUSG00000060675	Pla2g16	0.00594014	C9
	ENSMUSG00000022420	Dnalc4	0.00598133	C9
	ENSMUSG00000050912	Tmem123	0.00602737	C9
	ENSMUSG00000020368	Canx	0.00614755	C9
	ENSMUSG00000024007	Ppil1	0.00614799	C9
	ENSMUSG00000052423	B4galt3	0.00623326	C9
	ENSMUSG00000021248	Tmed10	0.00624015	C9
	ENSMUSG00000037664	Cdkn1c	0.00626951	C9
	ENSMUSG00000038059	Smim3	0.00629077	C9
	ENSMUSG00000031821	Gins2	0.00630894	C9
	ENSMUSG00000053094	Tmem248	0.00631994	C9
	ENSMUSG00000003923	Tfam	0.00638036	C9
	ENSMUSG00000056370	Sftpb	0.00644959	C9
	ENSMUSG00000031068	Glrx3	0.00648553	C9
	ENSMUSG00000021453	Gadd45g	0.0064922	C9
	ENSMUSG00000030265	Kras	0.00649973	C9
	ENSMUSG00000029649	Pomp	0.00656866	C9
	ENSMUSG00000004864	Mapk13	0.00659018	C9
	ENSMUSG00000030659	Nucb2	0.00663459	C9
	ENSMUSG00000067367	Lyar	0.00668666	C9
	ENSMUSG00000031785	Gpr56	0.00670808	C9
	ENSMUSG00000085013	AC138765.1	0.00671089	C9
	ENSMUSG00000026810	Dpm2	0.00672774	C9
	ENSMUSG00000021252	0610007P14Rik	0.00678151	C9
	ENSMUSG00000024535	Snx24	0.00679658	C9
	ENSMUSG00000039202	Abhd2	0.00687691	C9
	ENSMUSG00000040693	Slco4c1	0.00698967	C9
	ENSMUSG00000026305	Lrrfip1	0.00707092	C9
	ENSMUSG00000053580	Tanc2	0.00711554	C9
	ENSMUSG00000031488	Rab11fip1	0.00721277	C9
	ENSMUSG00000033318	Gstt2	0.00723009	C9
	ENSMUSG00000055653	Gpc3	0.00738825	C9
	ENSMUSG00000069793	Slfn9	0.00739525	C9
	ENSMUSG00000083477	Gm5555	0.00743174	C9
	ENSMUSG00000020925	Ccdc43	0.007445	C9
	ENSMUSG00000031274	Col4a5	0.0074511	C9
	ENSMUSG00000030554	Synm	0.0074897	C9
	ENSMUSG00000040856	Dlk1	0.00755304	C9
	ENSMUSG00000039985	Fam60a	0.00757552	C9
	ENSMUSG00000048251	Bcl11b	0.00757976	C9
	ENSMUSG00000021116	Eif2s1	0.00760423	C9
	ENSMUSG00000086390	1810019D21Rik	0.00761069	C9
	ENSMUSG00000061175	Fnip2	0.00767348	C9
	ENSMUSG00000063019	Manbal	0.00767796	C9
	ENSMUSG00000007458	M6pr	0.00781397	C9
	ENSMUSG00000019779	Frk	0.00791426	C9
	ENSMUSG00000031089	Slc6a14	0.00791606	C9
	ENSMUSG00000069089	Cdk7	0.0079265	C9
	ENSMUSG00000022949	Clic6	0.00796812	C9
	ENSMUSG00000024421	Lama3	0.00799856	C9
	ENSMUSG00000047368	Abhd17b	0.00801658	C9
	ENSMUSG00000022528	Hes1	0.00802128	C9
	ENSMUSG00000040728	Esrp1	0.00802947	C9
	ENSMUSG00000004394	Tmed4	0.00809564	C9
	ENSMUSG00000020219	Timm13	0.00815443	C9
	ENSMUSG00000000296	Tpd52l1	0.00832012	C9
	ENSMUSG00000019810	Fuca2	0.00842331	C9
	ENSMUSG00000018821	Avpi1	0.00847165	C9
	ENSMUSG00000021094	Dhrs7	0.00848336	C9
	ENSMUSG00000002015	Bcap31	0.00848738	C9
	ENSMUSG00000019368	Sec14l4	0.00853132	C9
	ENSMUSG00000020390	Ube2b	0.00855342	C9
	ENSMUSG00000073435	Nme3	0.00855667	C9
	ENSMUSG00000036585	Fgf1	0.00856954	C9
	ENSMUSG00000030587	2200002D01Rik	0.00861108	C9
	ENSMUSG00000021810	Ecd	0.00862379	C9
	ENSMUSG00000034024	Cct2	0.00879711	C9
	ENSMUSG00000073676	Hspe1	0.00879768	C9
	ENSMUSG00000052428	Tmco1	0.00895438	C9
	ENSMUSG00000006418	Rnf114	0.00897205	C9
	ENSMUSG00000032092	Mpzl2	0.00904092	C9
	ENSMUSG00000053399	Adamts18	0.00924989	C9
	ENSMUSG00000032232	Cgnl1	0.00925329	C9
	ENSMUSG00000034687	Fras1	0.00926957	C9
	ENSMUSG00000021057	Akap5	0.00936119	C9
	ENSMUSG00000005148	Klf5	0.00943618	C9
	ENSMUSG00000030980	Knop1	0.00956241	C9
	ENSMUSG00000032527	Pccb	0.00958795	C9
	ENSMUSG00000001228	Uhrf1	0.00965977	C9
	ENSMUSG00000055681	Cope	0.0097816	C9
	ENSMUSG00000024151	Msh2	0.0098424	C9
	ENSMUSG00000000184	Ccnd2	0.00984984	C9
	ENSMUSG00000026197	Zfand2b	0.00998064	C9
	ENSMUSG00000045284	Dcaf12l1	5.53383e-09	C4
	ENSMUSG00000064382	Gm26447	5.43446e-07	C4
	ENSMUSG00000029108	Pcdh7	6.04875e-07	C4
	ENSMUSG00000038507	Parp12	9.89085e-06	C4
	ENSMUSG00000089286	Gm24277	1.34923e-05	C4
	ENSMUSG00000089729	Gm16552	1.34923e-05	C4
	ENSMUSG00000085514	9530048J24Rik	6.25311e-05	C4
	ENSMUSG00000030424	Zfp939	8.58341e-05	C4
	ENSMUSG00000058661	Gm7452	0.00010646	C4
	ENSMUSG00000033313	Fbxl8	0.00010756	C4
	ENSMUSG00000086495	Gm13778	0.000113178	C4
	ENSMUSG00000034614	Pik3ip1	0.000115951	C4
	ENSMUSG00000035007	Rundc1	0.000163259	C4
	ENSMUSG00000028958	Tmub1	0.000189495	C4
	ENSMUSG00000032834	Pwp2	0.000237436	C4
	ENSMUSG00000028370	Pappa	0.000266339	C4
	ENSMUSG00000036395	Glb1l2	0.000303142	C4
	ENSMUSG00000022546	Gpt	0.000334275	C4
	ENSMUSG00000017765	Slc12a4	0.000349123	C4
	ENSMUSG00000090218	AC161765.1	0.000402377	C4
	ENSMUSG00000039483	Asb6	0.000416394	C4
	ENSMUSG00000015942	Gtf2ird2	0.000441092	C4
	ENSMUSG00000037014	Sstr4	0.000668883	C4
	ENSMUSG00000059866	Tnip2	0.000779058	C4
	ENSMUSG00000064602	Snora41	0.000791149	C4
	ENSMUSG00000038884	A230050P20Rik	0.000796851	C4
	ENSMUSG00000085310	Gm11491	0.000832709	C4
	ENSMUSG00000084911	Gm16185	0.000905671	C4
	ENSMUSG00000026239	Pde6d	0.000998686	C4
	ENSMUSG00000031398	Plxna3	0.00109762	C4
	ENSMUSG00000036764	Dnajc12	0.00114411	C4
	ENSMUSG00000049734	Trex1	0.0011706	C4
	ENSMUSG00000078789	Dph1	0.0012083	C4
	ENSMUSG00000042505	Acn9	0.00121291	C4
	ENSMUSG00000053070	9230110C19Rik	0.00126013	C4
	ENSMUSG00000054945	Gm9958	0.00139388	C4
	ENSMUSG00000031767	Nudt7	0.00152011	C4
	ENSMUSG00000074394	Vmn2r29	0.00155111	C4
	ENSMUSG00000078900	AC104882.1	0.00164672	C4
	ENSMUSG00000035184	Fam124a	0.00172633	C4
	ENSMUSG00000067536	Dnahc7b	0.00179405	C4
	ENSMUSG00000032850	Rnft2	0.00179405	C4
	ENSMUSG00000021840	Mapk1ip1l	0.00194414	C4
	ENSMUSG00000040605	Bace2	0.0019765	C4
	ENSMUSG00000073603	AC121821.1	0.0019765	C4
	ENSMUSG00000010609	Psen2	0.00200182	C4
	ENSMUSG00000038954	Supt3	0.00202599	C4
	ENSMUSG00000019487	Trip10	0.00207287	C4
	ENSMUSG00000027257	Pacsin3	0.00218498	C4
	ENSMUSG00000044730	9930104L06Rik	0.00239965	C4
	ENSMUSG00000024420	Zfp521	0.00244388	C4
	ENSMUSG00000073638	Mpp7	0.00257796	C4
	ENSMUSG00000011837	Snapc2	0.00266983	C4
	ENSMUSG00000029071	Dvl1	0.0026955	C4
	ENSMUSG00000000538	Tom1l2	0.00284541	C4
	ENSMUSG00000078174	AC137525.2	0.00290768	C4
	ENSMUSG00000039201	Tbc1d25	0.00293429	C4
	ENSMUSG00000075389	2810410L24Rik	0.00293688	C4
	ENSMUSG00000037697	Ddhd1	0.00312769	C4
	ENSMUSG00000044348	Slc25a53	0.00314359	C4
	ENSMUSG00000039018	Mtg1	0.00330609	C4
	ENSMUSG00000050248	Evc2	0.00330609	C4
	ENSMUSG00000025470	Zfp511	0.00350174	C4
	ENSMUSG00000035933	Cog5	0.00352981	C4
	ENSMUSG00000044906	4930503L19Rik	0.00357738	C4
	ENSMUSG00000025025	Mxi1	0.00363403	C4
	ENSMUSG00000044095	Ccdc166	0.00379273	C4
	ENSMUSG00000000916	Nsun5	0.00384387	C4
	ENSMUSG00000074793	Hspa12b	0.00386298	C4
	ENSMUSG00000025766	D3Ertd751e	0.00387509	C4
	ENSMUSG00000085062	AC147987.1	0.00390192	C4
	ENSMUSG00000022792	Yars2	0.00397972	C4
	ENSMUSG00000062202	Btbd9	0.00401279	C4
	ENSMUSG00000020309	Chac2	0.00402479	C4
	ENSMUSG00000001131	Timp1	0.00409356	C4
	ENSMUSG00000036873	2410004B18Rik	0.00413495	C4
	ENSMUSG00000023070	Rgn	0.00429943	C4
	ENSMUSG00000021514	Zfp369	0.00465915	C4
	ENSMUSG00000079551	AC112968.1	0.00476624	C4
	ENSMUSG00000020988	L2hgdh	0.0048533	C4
	ENSMUSG00000025195	Dnmbp	0.00509585	C4
	ENSMUSG00000027215	Cd82	0.00539238	C4
	ENSMUSG00000032456	Nmnat3	0.00544802	C4
	ENSMUSG00000022235	Cmbl	0.00544802	C4
	ENSMUSG00000022092	Ppp3cc	0.00544802	C4
	ENSMUSG00000063904	Dpp3	0.00565062	C4
	ENSMUSG00000055660	Mettl4	0.00569272	C4
	ENSMUSG00000033105	Lss	0.00569694	C4
	ENSMUSG00000032508	Myd88	0.00576342	C4
	ENSMUSG00000041594	Tmtc4	0.00589174	C4
	ENSMUSG00000070167	Gm25822	0.00590889	C4
	ENSMUSG00000001576	Ergic1	0.00607272	C4
	ENSMUSG00000023927	Satb1	0.00624325	C4
	ENSMUSG00000035329	Fbxo33	0.00629958	C4
	ENSMUSG00000028007	Snx7	0.00643207	C4
	ENSMUSG00000024182	Axin1	0.00650977	C4
	ENSMUSG00000021866	Anxa11	0.00659923	C4
	ENSMUSG00000034928	Rnf44	0.00680245	C4
	ENSMUSG00000032239	Rp9	0.00682403	C4
	ENSMUSG00000046572	Zfp518b	0.00682403	C4
	ENSMUSG00000003657	Calb2	0.00685072	C4
	ENSMUSG00000090049	AL593853.1	0.00685072	C4
	ENSMUSG00000003528	Slc25a1	0.00688516	C4
	ENSMUSG00000030562	Nox4	0.00696812	C4
	ENSMUSG00000039704	Lmbrd2	0.00708163	C4
	ENSMUSG00000022100	Xpo7	0.00712015	C4
	ENSMUSG00000026279	Thap4	0.00719044	C4
	ENSMUSG00000087274	AC130654.1	0.007287	C4
	ENSMUSG00000037640	Zfp60	0.00731508	C4
	ENSMUSG00000029016	Clcn6	0.00738633	C4
	ENSMUSG00000032571	Pik3r4	0.00743902	C4
	ENSMUSG00000041491	Cep78	0.00743902	C4
	ENSMUSG00000086471	AC115727.1	0.00743902	C4
	ENSMUSG00000026471	Mr1	0.00743902	C4
	ENSMUSG00000027185	Nat10	0.00745272	C4
	ENSMUSG00000007279	Scube2	0.00747595	C4
	ENSMUSG00000051278	4930422G04Rik	0.00761539	C4
	ENSMUSG00000071658	Gng3	0.00763879	C4
	ENSMUSG00000052296	Ppp6r1	0.00765818	C4
	ENSMUSG00000037204	9430023L20Rik	0.00767207	C4
	ENSMUSG00000013822	Elof1	0.00767901	C4
	ENSMUSG00000028322	Exosc3	0.00774944	C4
	ENSMUSG00000045934	Mtmr11	0.00779988	C4
	ENSMUSG00000068663	Clec16a	0.00782657	C4
	ENSMUSG00000039219	Arid4b	0.00783691	C4
	ENSMUSG00000069835	Sat2	0.00784943	C4
	ENSMUSG00000018395	Kif3a	0.00786516	C4
	ENSMUSG00000057177	Gsk3a	0.00793459	C4
	ENSMUSG00000023104	Rfc2	0.00802026	C4
	ENSMUSG00000087687	Pet100	0.00813078	C4
	ENSMUSG00000022159	Rab2b	0.00814715	C4
	ENSMUSG00000031835	Mbtps1	0.00817953	C4
	ENSMUSG00000069045	Ddx3y	0.00821465	C4
	ENSMUSG00000035142	Nubpl	0.00827264	C4
	ENSMUSG00000027108	Ola1	0.00827367	C4
	ENSMUSG00000030413	Pglyrp1	0.00837933	C4
	ENSMUSG00000031546	Gins4	0.00838074	C4
	ENSMUSG00000023156	Rpp14	0.00839921	C4
	ENSMUSG00000011877	Git1	0.00843122	C4
	ENSMUSG00000048583	Igf2	0.0084319	C4
	ENSMUSG00000038816	Ctnnal1	0.00843511	C4
	ENSMUSG00000007867	Ift43	0.00851896	C4
	ENSMUSG00000059495	Arhgef12	0.00856305	C4
	ENSMUSG00000014850	Msh3	0.00865622	C4
	ENSMUSG00000024018	Ccdc167	0.00872338	C4
	ENSMUSG00000031983	2310022B05Rik	0.00878457	C4
	ENSMUSG00000049488	Tmem67	0.00893888	C4
	ENSMUSG00000041870	Ankrd13a	0.00907608	C4
	ENSMUSG00000021177	Tdp1	0.00933888	C4
	ENSMUSG00000022237	Ankrd33b	0.00936891	C4
	ENSMUSG00000020817	Rabep1	0.00937044	C4
	ENSMUSG00000024785	Rcl1	0.00950746	C4
	ENSMUSG00000039016	Timm8b	0.00953529	C4
	ENSMUSG00000034203	Chchd4	0.00965068	C4
	ENSMUSG00000026575	Nme7	0.00971129	C4
	ENSMUSG00000026812	Tsc1	0.00990609	C4
	ENSMUSG00000047653	AL606704.1	2.39272e-07	C6
	ENSMUSG00000043153	Ispd	7.02796e-07	C6
	ENSMUSG00000055849	Gm9983	5.92119e-06	C6
	ENSMUSG00000074700	Gm10746	1.34923e-05	C6
	ENSMUSG00000079997	AC154377.2	1.34923e-05	C6
	ENSMUSG00000024935	Slc1a1	2.73624e-05	C6
	ENSMUSG00000079605	Zbtb9	5.12718e-05	C6
	ENSMUSG00000089989	Flt3l	9.17593e-05	C6
	ENSMUSG00000047910	Pcdhb16	0.000203516	C6
	ENSMUSG00000061414	Efcab4b	0.000209002	C6
	ENSMUSG00000024074	Crim1	0.000211706	C6
	ENSMUSG00000022901	Cd86	0.000354633	C6
	ENSMUSG00000044551	9930012K11Rik	0.000416394	C6
	ENSMUSG00000084362	2610024D14Rik	0.000474955	C6
	ENSMUSG00000064602	Snora41	0.000564263	C6
	ENSMUSG00000061013	Mkx	0.000580917	C6
	ENSMUSG00000038280	Ostm1	0.000714386	C6
	ENSMUSG00000034343	Ube2f	0.000850438	C6
	ENSMUSG00000065336	Snora34	0.000991128	C6
	ENSMUSG00000063018	2010204K13Rik	0.00100574	C6
	ENSMUSG00000024677	Ms4a6b	0.00118755	C6
	ENSMUSG00000032850	Rnft2	0.00133853	C6
	ENSMUSG00000078772	Gm12353	0.00133853	C6
	ENSMUSG00000078369	AA645497	0.00155111	C6
	ENSMUSG00000085704	4921531C22Rik	0.00170039	C6
	ENSMUSG00000030409	Dmpk	0.00182568	C6
	ENSMUSG00000062518	Zfp534	0.00184092	C6
	ENSMUSG00000089292	Gm23209	0.0019765	C6
	ENSMUSG00000028389	Zfp37	0.00222053	C6
	ENSMUSG00000004748	Mtfp1	0.00225569	C6
	ENSMUSG00000086877	A230072C01Rik	0.00231307	C6
	ENSMUSG00000042210	Abhd14a	0.00250409	C6
	ENSMUSG00000075303	AC159829.1	0.00257796	C6
	ENSMUSG00000026890	Lhx6	0.00257796	C6
	ENSMUSG00000024592	C330018D20Rik	0.00258131	C6
	ENSMUSG00000041309	Nkx6-2	0.00261912	C6
	ENSMUSG00000068115	Ninl	0.00280779	C6
	ENSMUSG00000045876	Pcdhb8	0.00293688	C6
	ENSMUSG00000073638	Mpp7	0.00334024	C6
	ENSMUSG00000024533	Spire1	0.00349332	C6
	ENSMUSG00000023795	Pisd-ps2	0.00363638	C6
	ENSMUSG00000008604	Ubqln4	0.00377246	C6
	ENSMUSG00000043225	Gm9779	0.00383457	C6
	ENSMUSG00000086787	AL591113.1	0.0038586	C6
	ENSMUSG00000063652	Slc22a21	0.00401279	C6
	ENSMUSG00000064030	Wibg	0.00413609	C6
	ENSMUSG00000014776	Nol3	0.0041837	C6
	ENSMUSG00000060579	Fhit	0.00429943	C6
	ENSMUSG00000022057	Adamdec1	0.00431714	C6
	ENSMUSG00000029851	Fam115c	0.00436737	C6
	ENSMUSG00000061371	Zfp873	0.00457777	C6
	ENSMUSG00000036863	Syde2	0.00460039	C6
	ENSMUSG00000074890	Lcmt2	0.00461673	C6
	ENSMUSG00000023999	Kif6	0.00472308	C6
	ENSMUSG00000085626	Gm12898	0.00472308	C6
	ENSMUSG00000078636	Gm7336	0.00490578	C6
	ENSMUSG00000022526	Zfp251	0.00493245	C6
	ENSMUSG00000039523	Cep104	0.00525998	C6
	ENSMUSG00000048332	Lhfp	0.00526296	C6
	ENSMUSG00000083306	Gm13868	0.00527439	C6
	ENSMUSG00000042148	Cox10	0.00539516	C6
	ENSMUSG00000037318	Traf3ip3	0.00544802	C6
	ENSMUSG00000041889	Shisa4	0.00565062	C6
	ENSMUSG00000036862	Dchs1	0.0056686	C6
	ENSMUSG00000026239	Pde6d	0.00582231	C6
	ENSMUSG00000085218	BB218582	0.00588221	C6
	ENSMUSG00000041609	Ccdc64	0.00588221	C6
	ENSMUSG00000025270	Alas2	0.00588221	C6
	ENSMUSG00000033068	Entpd6	0.00592573	C6
	ENSMUSG00000034471	Caskin2	0.00632078	C6
	ENSMUSG00000086901	RP23-26D22.7	0.00655138	C6
	ENSMUSG00000033530	Ttc7b	0.00663506	C6
	ENSMUSG00000088769	Gm22637	0.00685072	C6
	ENSMUSG00000022089	Bin3	0.00691501	C6
	ENSMUSG00000027583	Zbtb46	0.00696812	C6
	ENSMUSG00000003402	Prkcsh	0.00697996	C6
	ENSMUSG00000072974	Gm4787	0.007287	C6
	ENSMUSG00000087819	Gm25117	0.007287	C6
	ENSMUSG00000024177	Nme4	0.0073196	C6
	ENSMUSG00000048833	Slc39a9	0.00736532	C6
	ENSMUSG00000042659	Arrdc4	0.00743834	C6
	ENSMUSG00000026049	Tex30	0.00747911	C6
	ENSMUSG00000078503	Gm13225	0.00749667	C6
	ENSMUSG00000037395	Rcor3	0.00762854	C6
	ENSMUSG00000070867	Trabd2b	0.00771181	C6
	ENSMUSG00000021567	Nkd2	0.00795541	C6
	ENSMUSG00000043162	Pyurf	0.00805172	C6
	ENSMUSG00000062761	Zfp512	0.00825504	C6
	ENSMUSG00000042426	Dhx29	0.00825531	C6
	ENSMUSG00000022828	Gtf2e1	0.00842858	C6
	ENSMUSG00000030801	Kat8	0.00851185	C6
	ENSMUSG00000022142	Nup155	0.00856788	C6
	ENSMUSG00000015501	Hivep2	0.0085947	C6
	ENSMUSG00000019303	Psmc3ip	0.00868003	C6
	ENSMUSG00000030317	Timp4	0.0089796	C6
	ENSMUSG00000026404	Ddx59	0.00903956	C6
	ENSMUSG00000037949	Ano10	0.00923415	C6
	ENSMUSG00000028995	Fam126a	0.00943708	C6
	ENSMUSG00000030309	Caprin2	0.00946514	C6
	ENSMUSG00000055884	Fancm	0.00958079	C6
	ENSMUSG00000038206	Fbxo8	0.00964546	C6
	ENSMUSG00000013415	Igf2bp1	0.00964546	C6
	ENSMUSG00000022620	Arsa	0.00975638	C6
	ENSMUSG00000011877	Git1	0.00975638	C6
	ENSMUSG00000041075	Fzd7	0.00977674	C6
	ENSMUSG00000075470	Alg10b	0.0099135	C6
