# Supplementary material for: SINCERA: A Pipeline for Single-Cell RNA-Seq Profiling Analysis
Source: PLoS Comput Biol. 2015 Nov 24;11(11):e1004575. doi: 10.1371/journal.pcbi.1004575 (PMC4658017; doi:10.1371/journal.pcbi.1004575)
Supplement: S1 Text — (DOC) [file pcbi.1004575.s015.doc]

**S1 Text. Calculation of Inter-Sample Cell Correlation and Inter-Sample Cell Distance.**

Consider two independent sample preparations of single-cell RNA-seq expression datasets . consists of the expression of *n* genes/transcripts in (cells from sample preparation 1) and consists of the expression of *n* genes/transcripts in (cells from sample preparation 2). Let be the Pearson’s correlation between and (two individual cells from two sample preparations), and be the Pearson’s correlation between and (two individual cells from the same sample preparation 1). The inter-sample cell correlation for a cell is defined as ; and the inter-sample cell distance for is defined as . The inter-sample cell correlations and distances for cells in are defined analogous.
